# Supplementary material
Source: PubMed Central journal article supplement (PMC2590668)

**Copper(II) Carboxylate Promoted Intramolecular Carboamination of Alkenes for  
the Synthesis of Polycyclic Lactams**

Peter H. Fuller and Sherry R. Chemler\*

Department of Chemistry, University at Buffalo,  
The State University of New York, Buffalo, New York 14260  
schemler@buffalo.edu

**Supporting Information 2:  $^1\text{H}$  and  $^{13}\text{C}$  NMR Data for Substrate and Product**

STANDARD 1H OBSERVE

Pulse Sequence: s2pu1  
 Solvent: CDCl3  
 Ambient temperature  
 INOVA-400 "cozy.chem.buffalo.edu"  
 Relax. delay 1.000 sec  
 Pulse 45.5 degrees  
 Acq. time 1.800 sec  
 Width 6200.6 Hz  
 16 Repetitions  
 OBSERVE F1: 393.9388918 MHz  
 DATA PROCESSING  
 Line broadening 0.3 Hz  
 FT size 32768  
 Total time 0 min, 44 sec

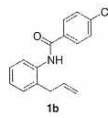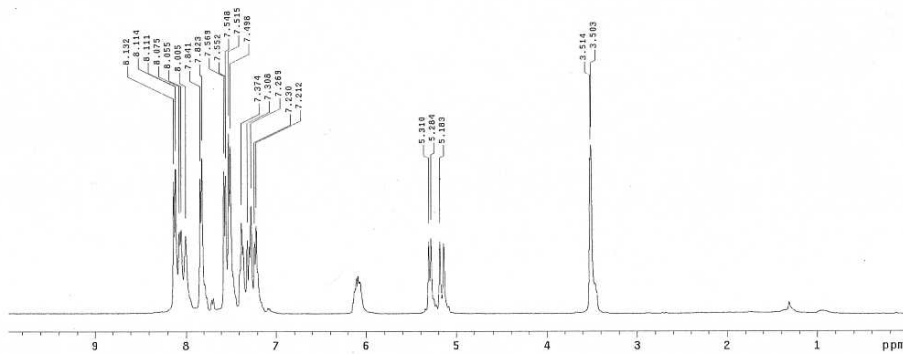

phf\_para\_c1\_sm\_c13

Pulse Sequence: s2pu1  
 Solvent: CDCl3  
 Ambient temperature  
 GEMINI-300 "cozy.chem.buffalo.edu"  
 Relax. delay 5.000 sec  
 Pulse 90.0 degrees  
 Acq. time 1.280 sec  
 Width 10761.7 Hz  
 16 Repetitions  
 OBSERVE C13: 75.4536195 MHz  
 DECOUPLE H1: 300.6754431 MHz  
 Power 1023 dB  
 Continuously on  
 WALTZ-16 modulated  
 DATA PROCESSING  
 Line broadening 1.0 Hz  
 FT size 65536  
 Total time 1 hr, 58 min, 57 sec

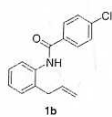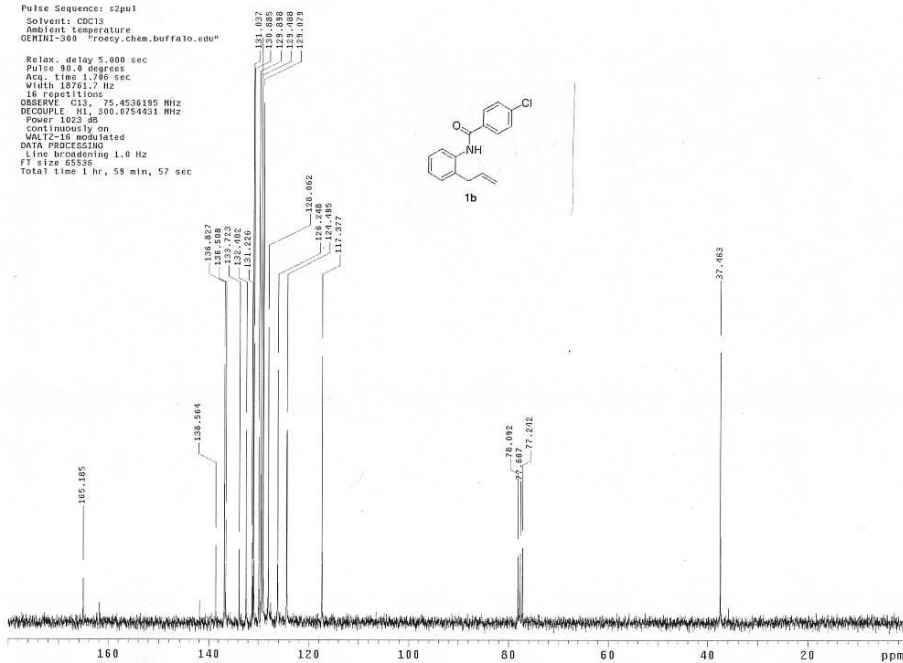

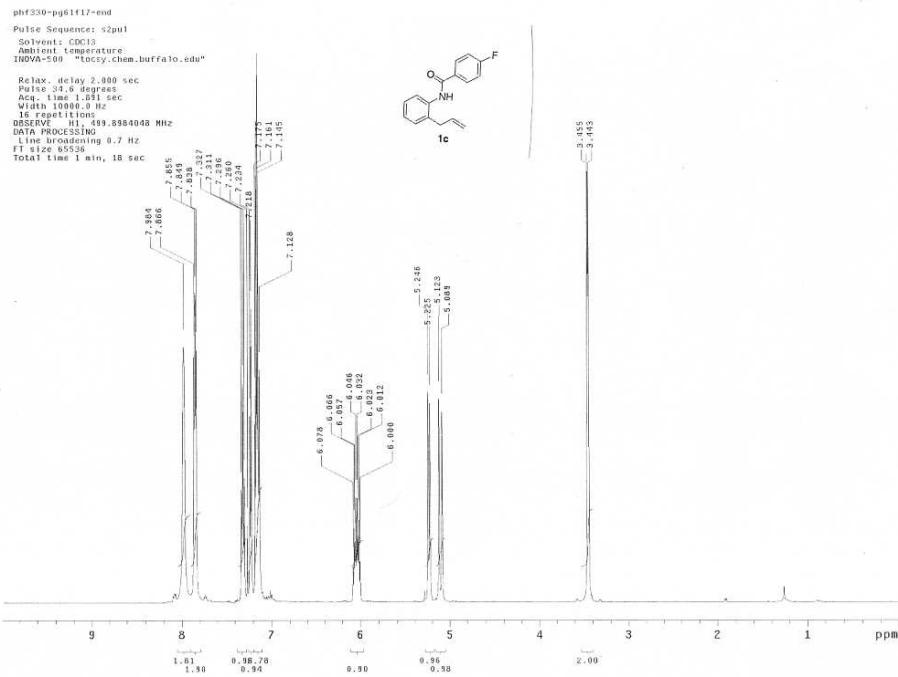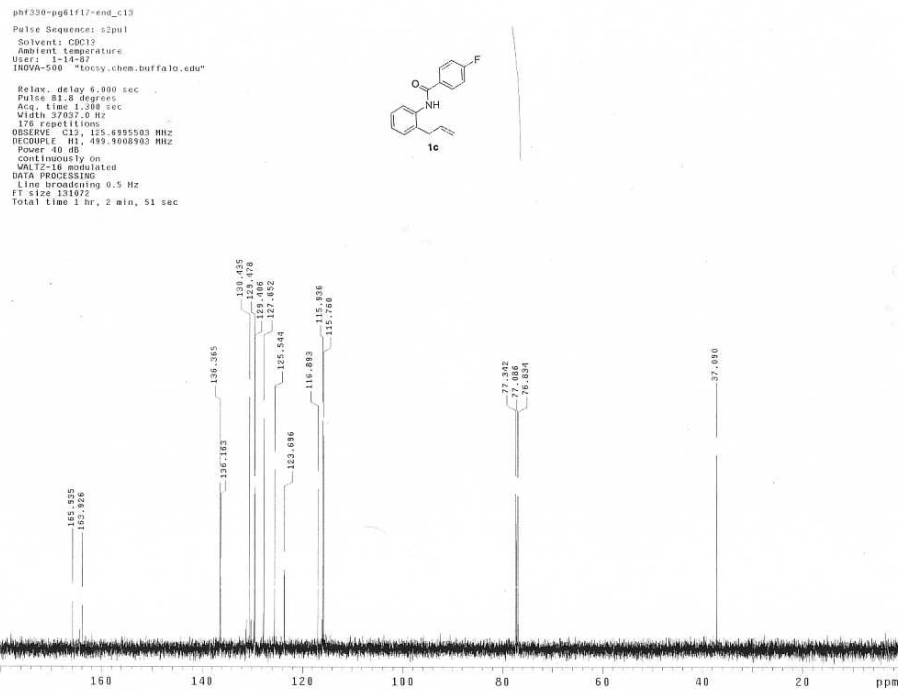

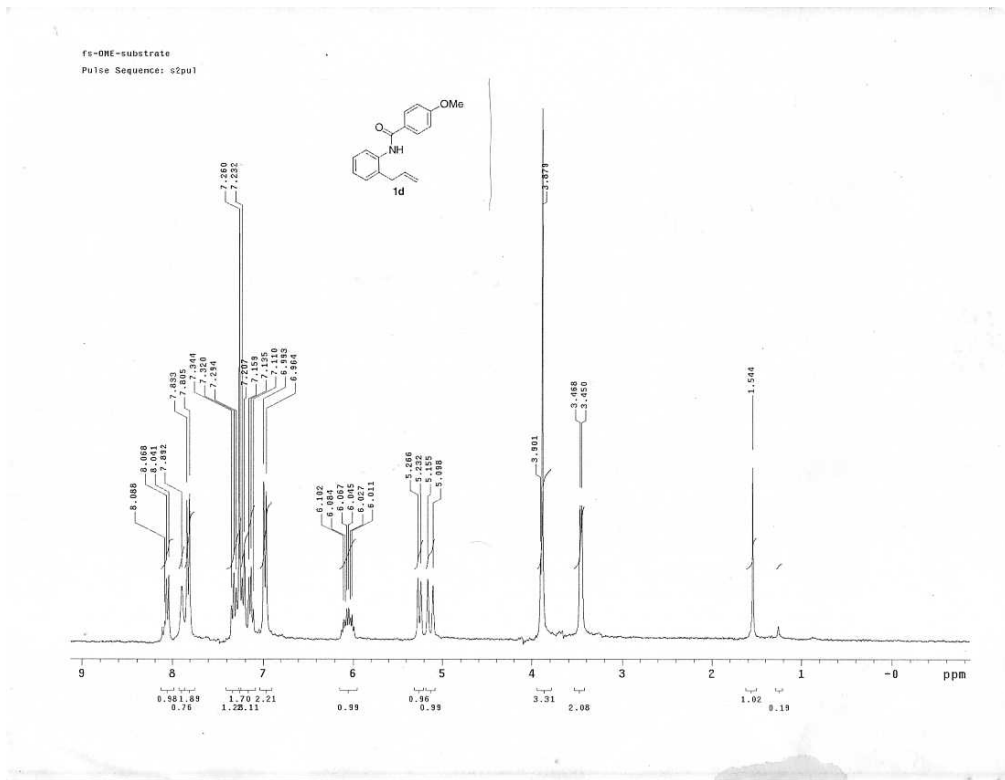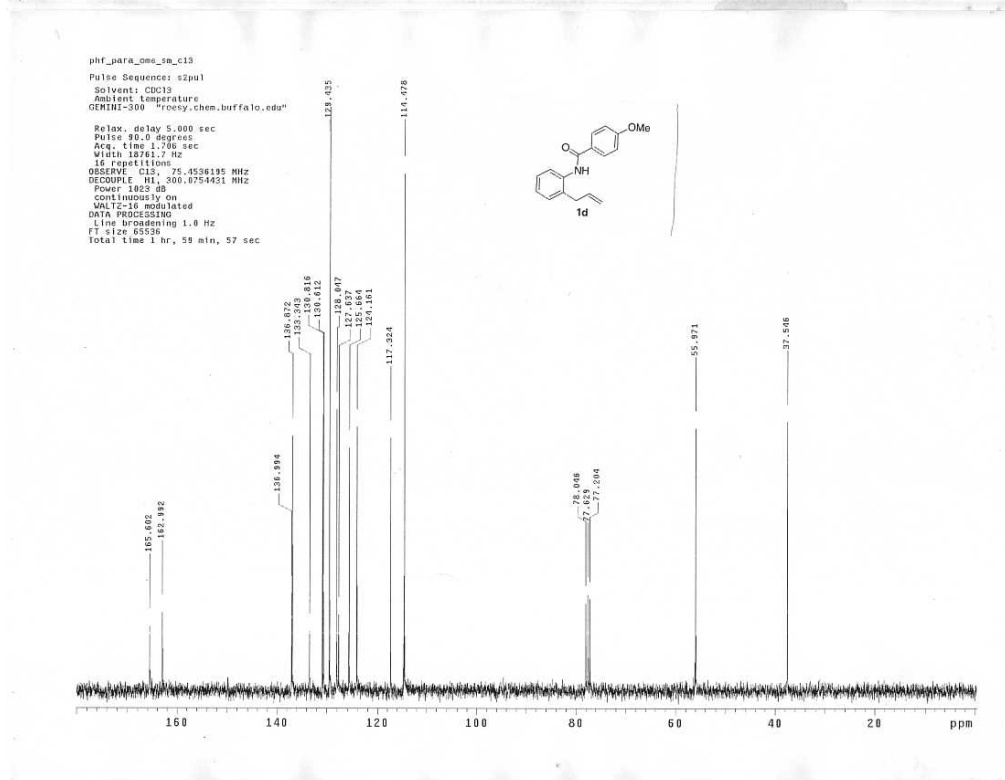

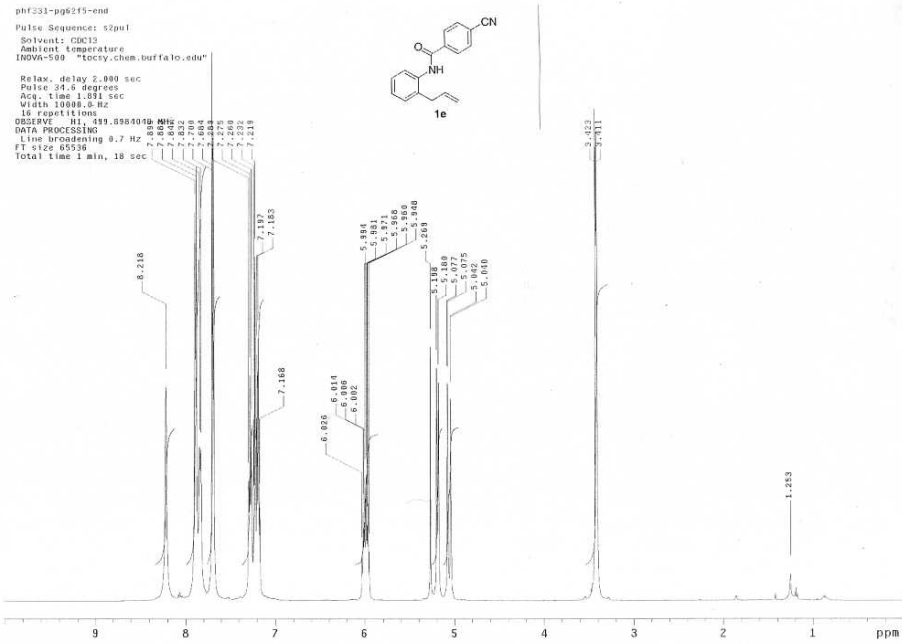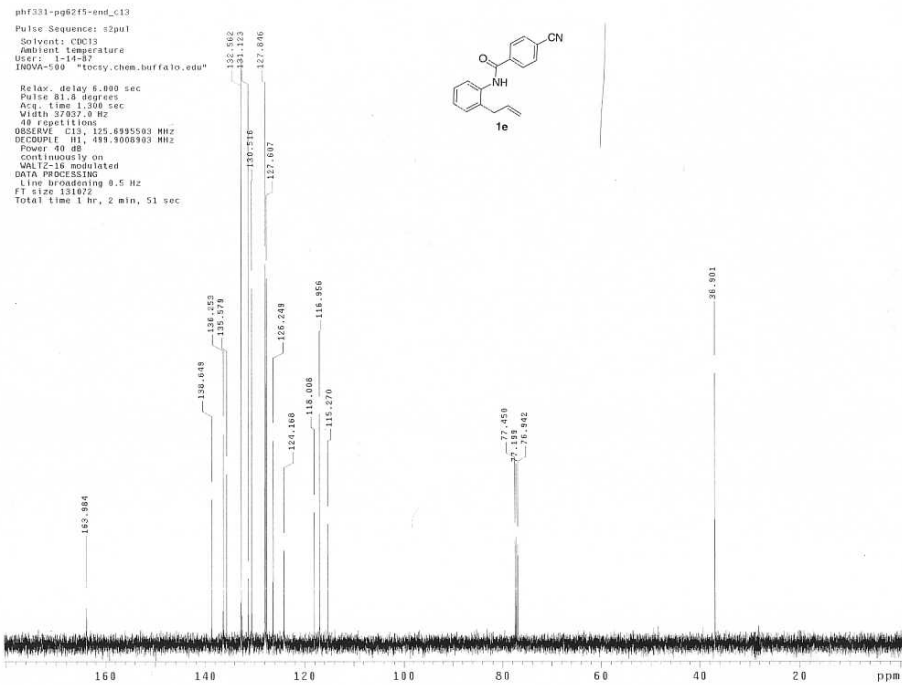

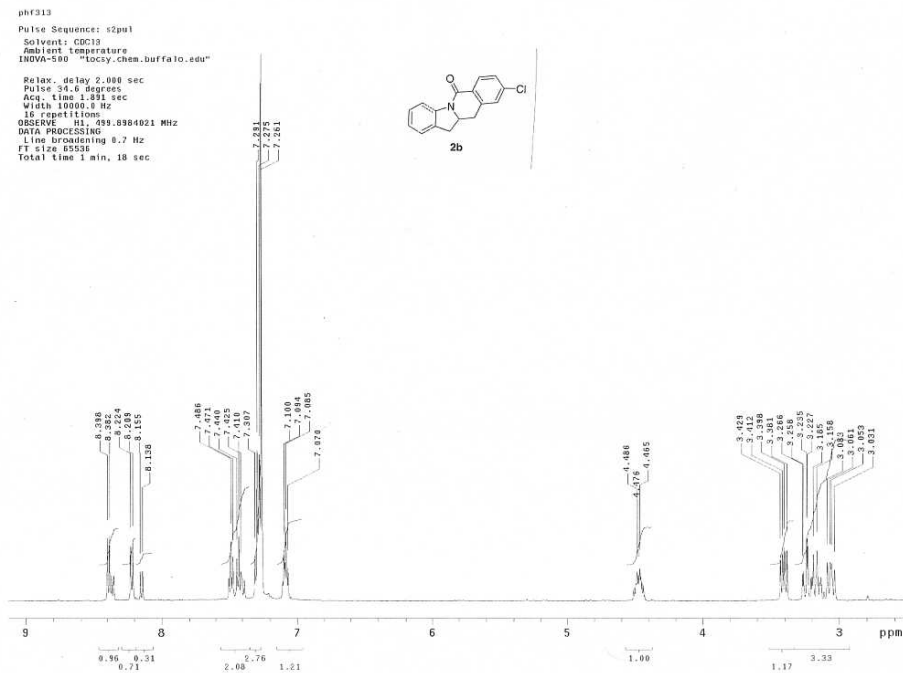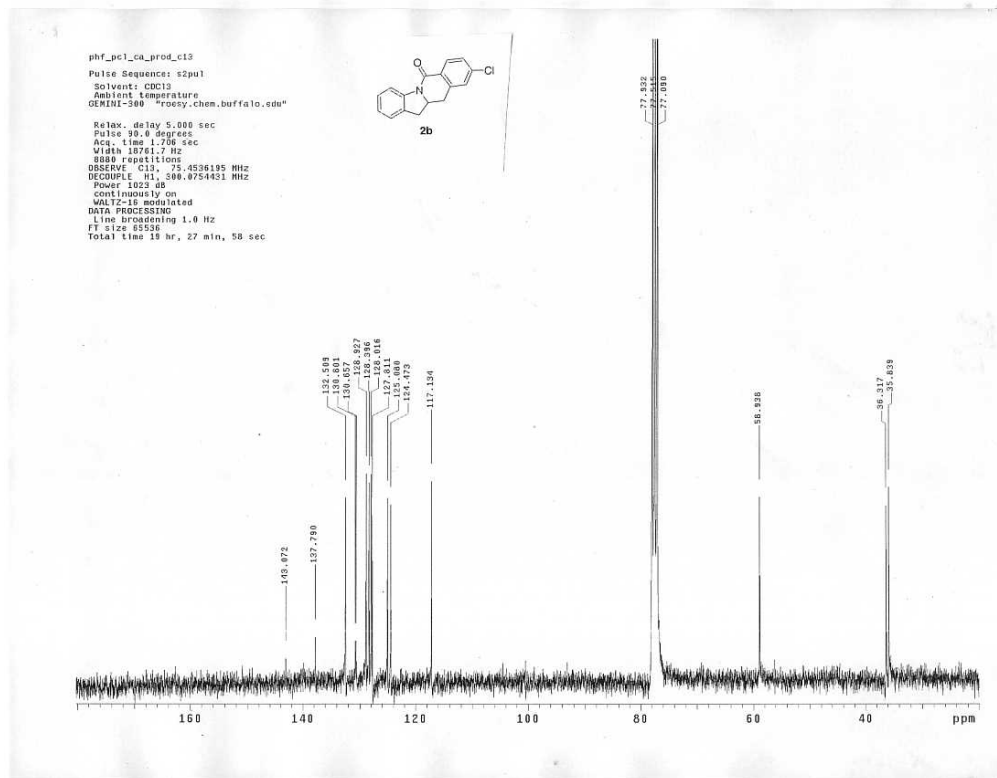

phf334-pg5colbf6-7  
 Pulse Sequence: s2pu1  
 Solvent: CDCl3  
 Ambient temperature  
 File: phf334-pg5colbf6-7  
 INOVA-400 \*cosy.chem.buffalo.edu\*  
 Relax. delay 1.000 sec  
 Pulse 48.9 degrees  
 Acq. time 1.808 sec  
 Width 8000.8 Hz  
 18 repetitions  
 OBSERVE H1, 399.9389047 MHz  
 DATA PROCESSING  
 Line broadening 0.9 Hz  
 FT size 52758  
 Total time 9 min, 44 sec

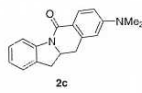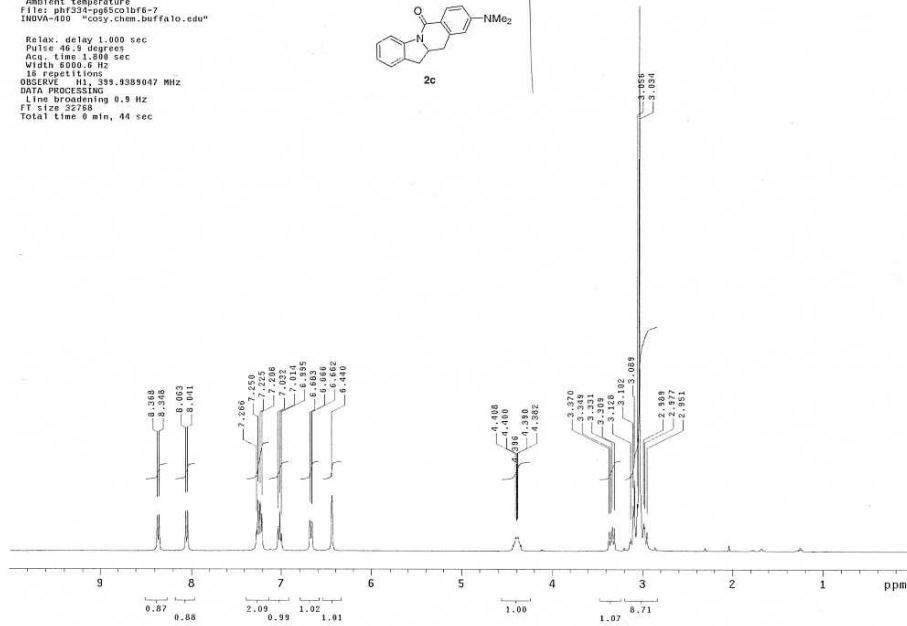

phf334-pg5colbf6-9  
 Pulse Sequence: s2pu1  
 Solvent: CDCl3  
 Ambient temperature  
 GEMINI-300 \*roesy.chem.buffalo.edu\*  
 Relax. delay 5.000 sec  
 Pulse 98.0 degrees  
 Acq. time 1.706 sec  
 Width 18761.7 Hz  
 3072 repetitions  
 OBSERVE C13, 75.4538195 MHz  
 DECOUPLE H1, 398.975933 MHz  
 Power 1023 dB  
 Continuously on  
 WALTZ-16 modulated  
 DATA PROCESSING  
 Line broadening 1.0 Hz  
 FT size 45538  
 Total time 19 hr, 27 min, 50 sec

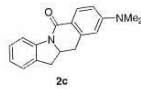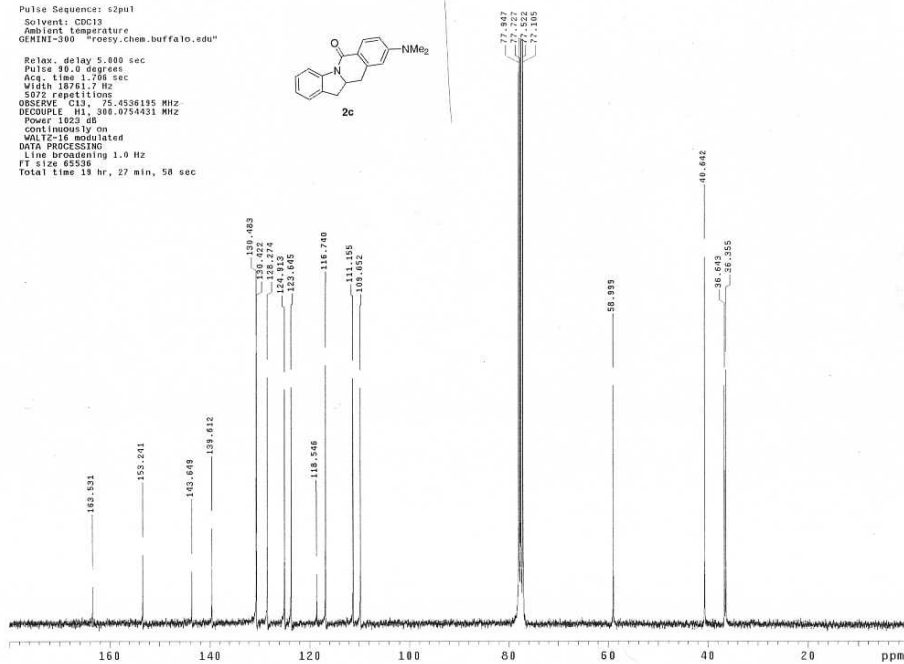

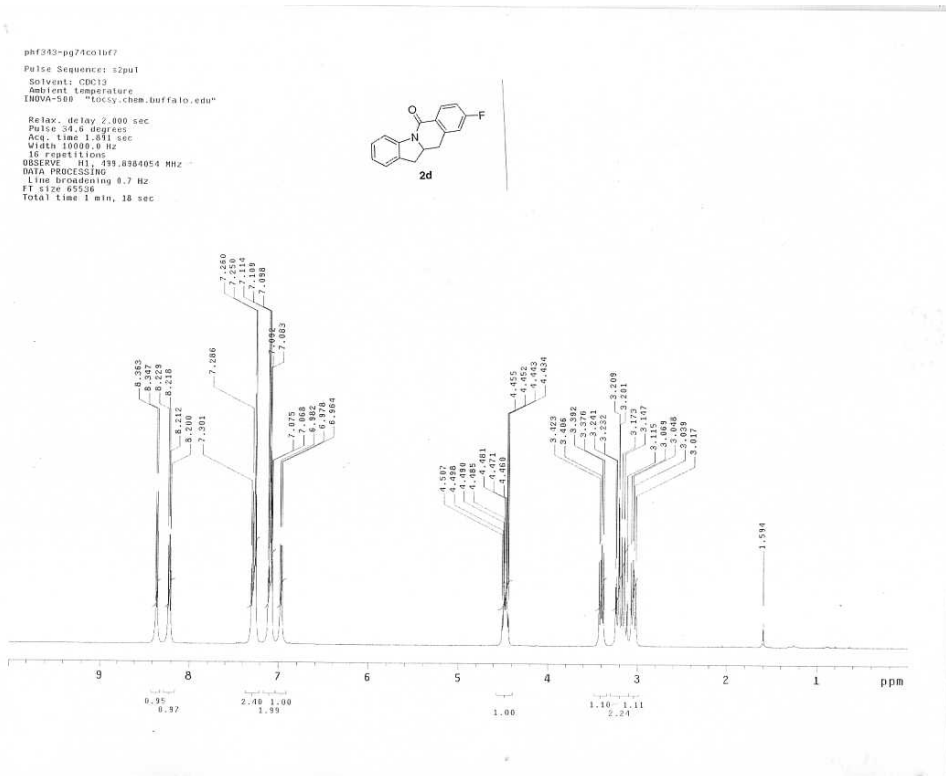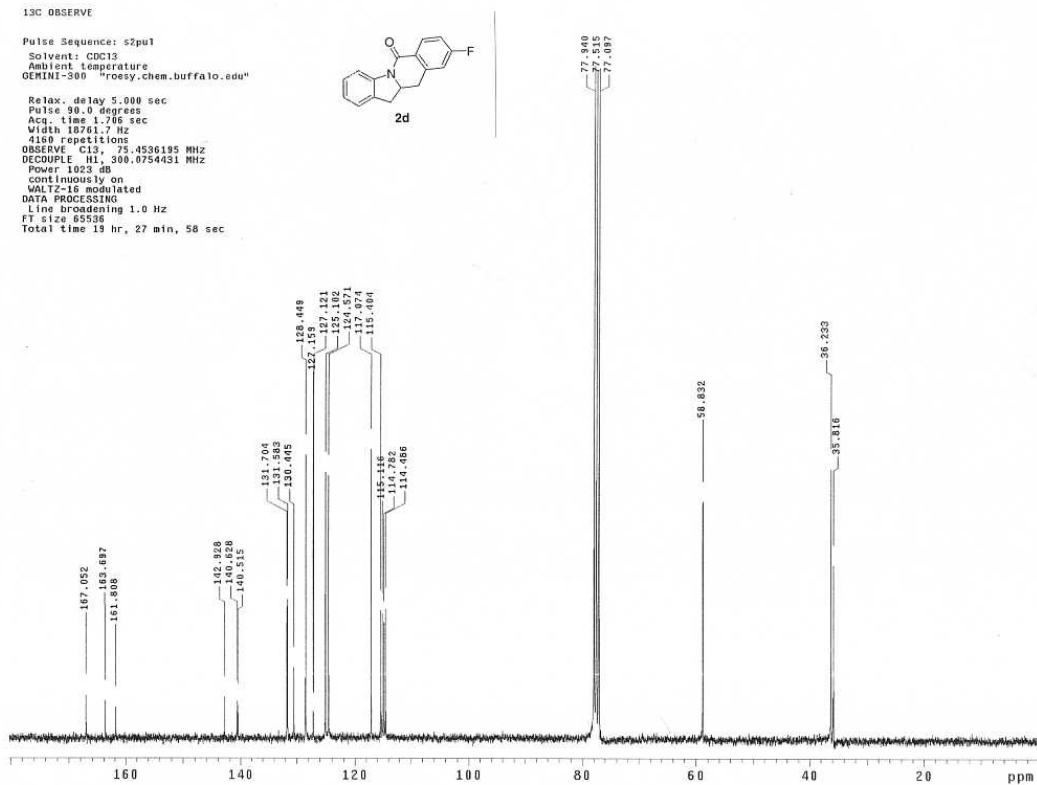



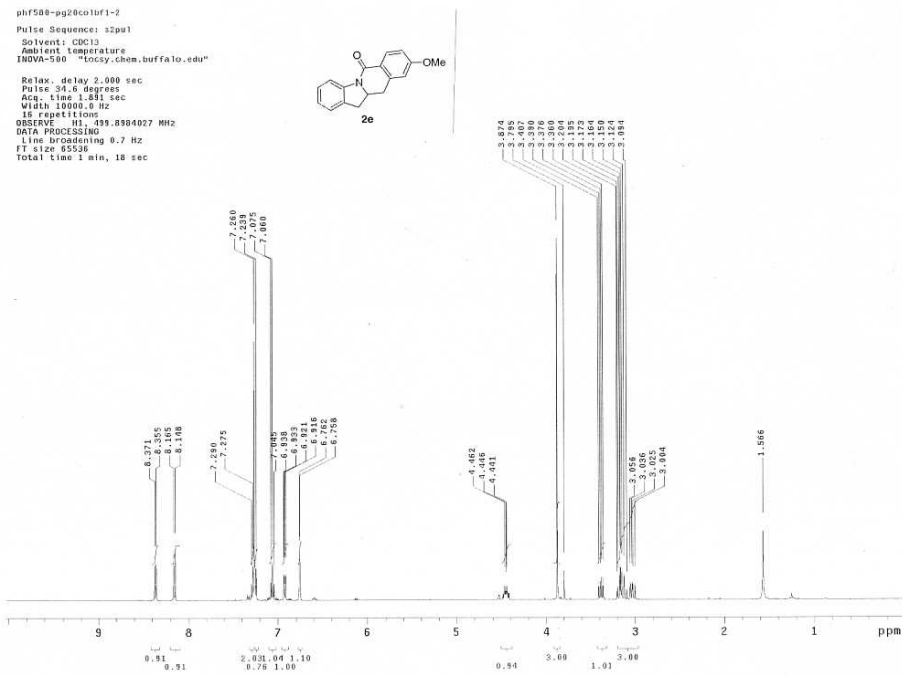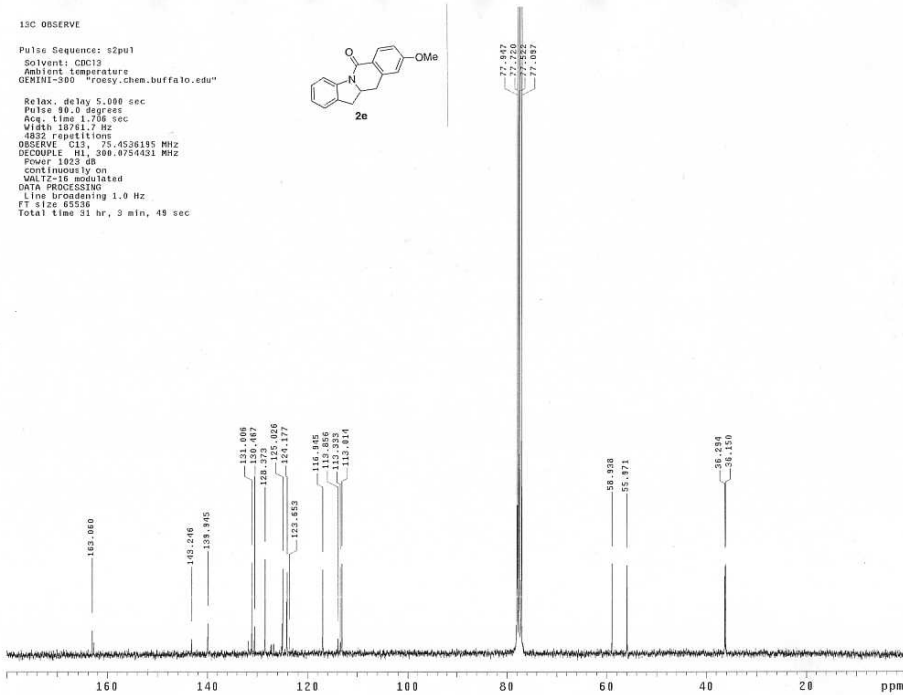

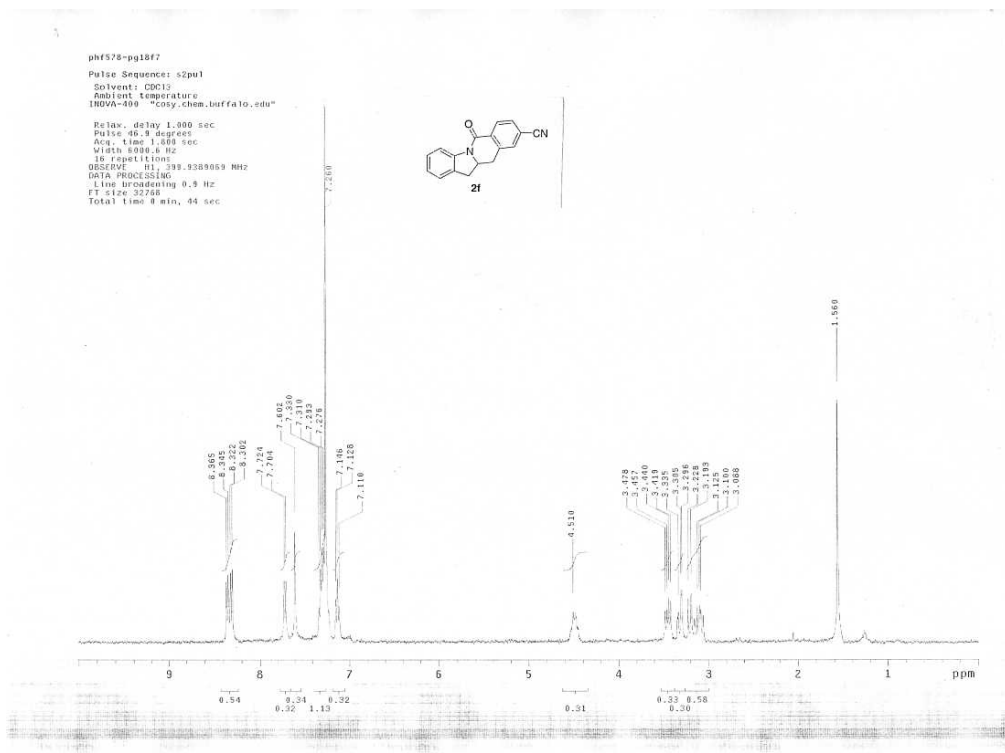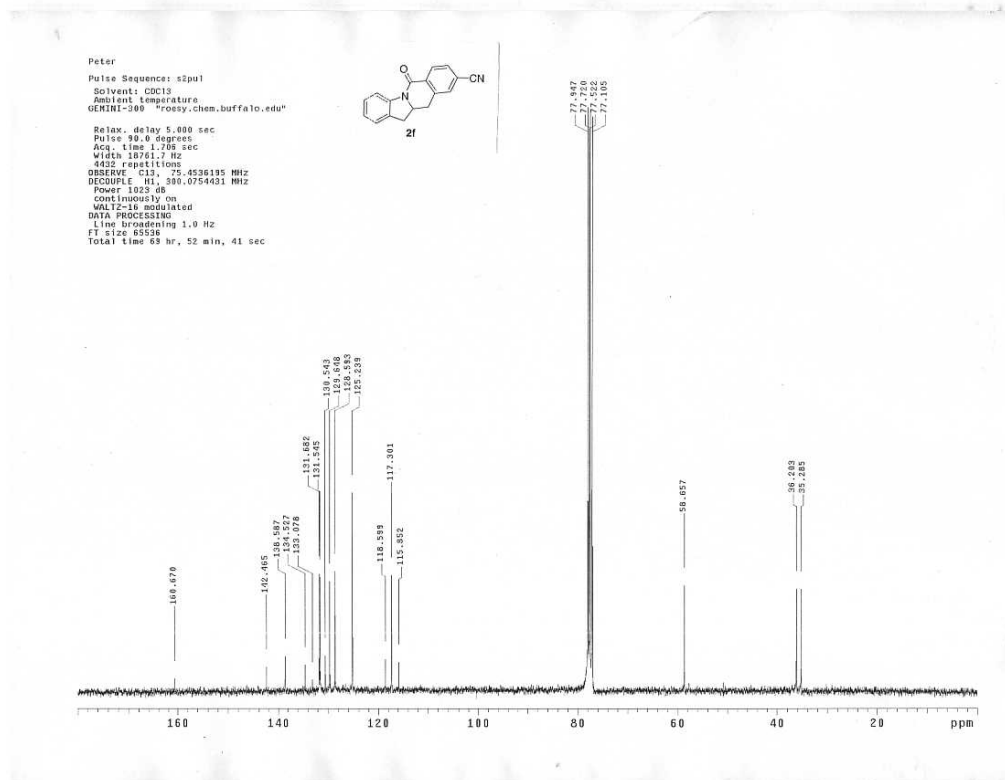

phf374-pg10576-37\_c13  
 Pulse Sequence: s2pul  
 Solvent: CDCl3  
 Ambient Temperature  
 INOVA-500 "kcsy.chem.buffalo.edu"  
 Relax. delay 2.000 sec  
 Pulse 24.6 degrees  
 Acq. time 1.051 sec  
 Width 19008.0 Hz  
 16 repetitions  
 OBSERVE H1, 499.8984058 MHz  
 DATA PROCESSING  
 Line broadening 8.7 Hz  
 FT size 65536  
 Total time 1 min, 18 sec

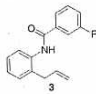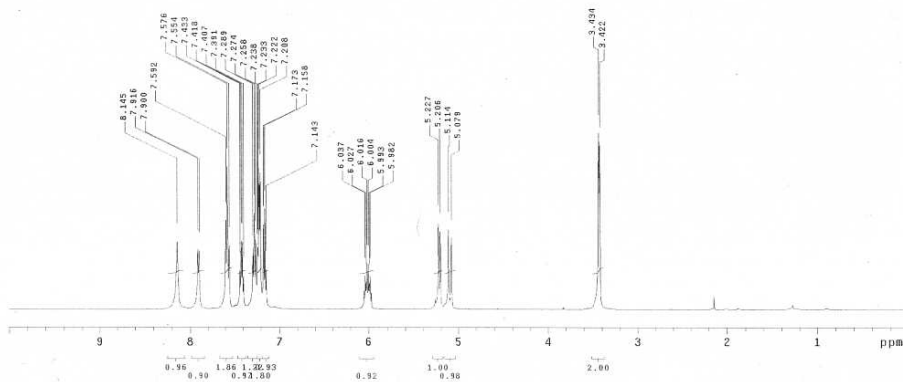

phf374-pg10576-37\_c13  
 Pulse Sequence: s2pul  
 Solvent: CDCl3  
 Ambient Temperature  
 User: j-14-07  
 INOVA-500 "kcsy.chem.buffalo.edu"  
 Relax. delay 8.000 sec  
 Pulse 61.8 degrees  
 Acq. time 1.200 sec  
 Width 37037.0 Hz  
 64 repetitions  
 OBSERVE C13, 125.6995503 MHz  
 DECOUPLE H1, 499.9008903 MHz  
 Power 40 dB  
 continuously on  
 WALTZ-16 modulated  
 DATA PROCESSING  
 Line broadening 0.5 Hz  
 FT size 131872  
 Total time 1 hr, 2 min, 51 sec

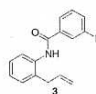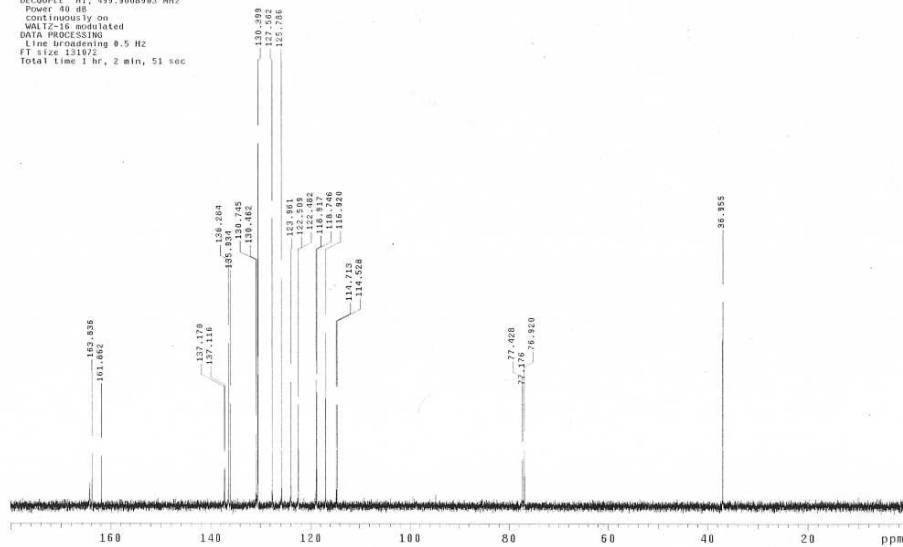

phf\_meta\_f\_ca\_prod2  
 Pulse Sequence: s2pul  
 Solvent: Acetone  
 Ambient temperature  
 INOVA-500 "tccy.chem.buffalo.edu"  
 Relax. delay 2.000 sec  
 Pulse 3.0 degrees  
 Acq. time 1.891 sec  
 Width 10000.0 Hz  
 16 repetitions  
 OBSERVE HI, 999.9910038 MHz  
 DATA PROCESSING  
 Line broadening 0.7 Hz  
 FT size 65536  
 Total time 1 min, 18 sec

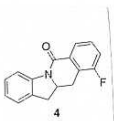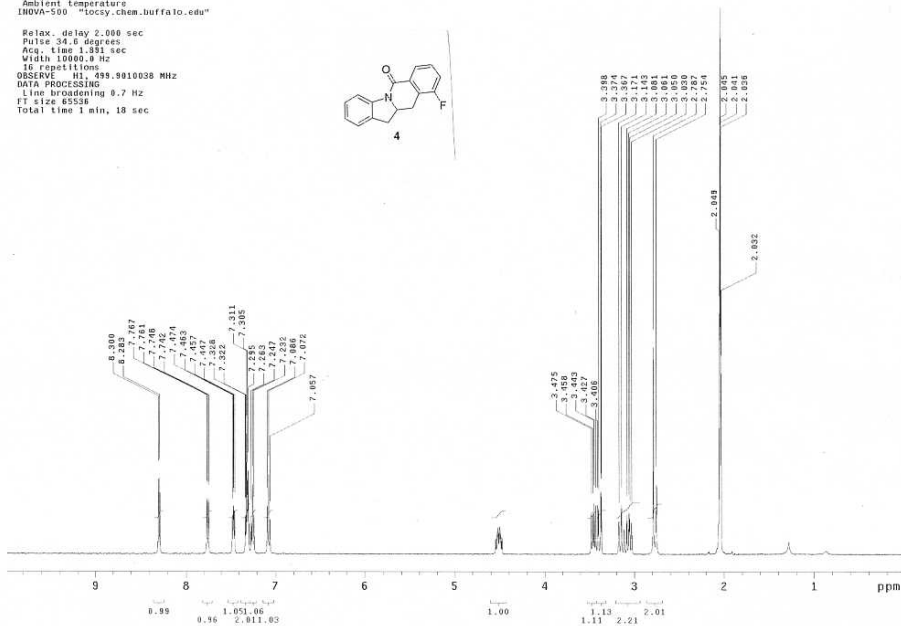

phf391-pg2125-49\_c13  
 Pulse Sequence: s2pul  
 Solvent: CDCl3  
 Ambient temperature  
 USAF: 1-14-87  
 INOVA-500 "tccy.chem.buffalo.edu"  
 Relax. delay 6.000 sec  
 Pulse 61.8 degrees  
 Acq. time 1.300 sec  
 Width 37487.8 Hz  
 280 repetitions  
 OBSERVE CH, 151.6195503 MHz  
 DECOUPLE HI, 499.9908903 MHz  
 Power 40 dB  
 continuously on  
 VMT2-18 modulated  
 DATA PROCESSING  
 Line broadening 0.5 Hz  
 FT size 131072  
 Total time 1 hr, 2 min, 51 sec

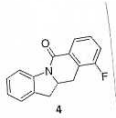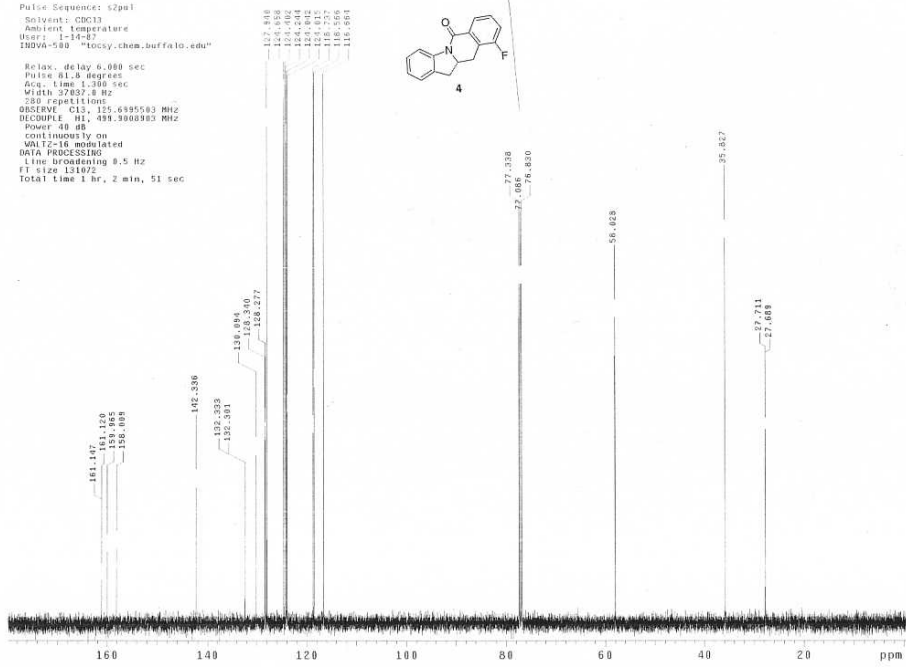

phf\_mta\_f\_cn\_prodt  
 Pulse Sequence: s2pul  
 Solvent: Acetone  
 Ambient Temperature  
 INOVA-500 "tocsy.chem.buffalo.edu"  
 Relax: delay 2.000 sec  
 Pulse: 20.6 degrees  
 Acq. Time: 1.951 sec  
 Width: 10000.0 Hz  
 16 repetitions  
 OBSERVE: H1, 499.9010038 MHz  
 DATA PROCESSING  
 Line broadening: 0.7 Hz  
 FT size: 65536  
 Total Time: 1 min, 18 sec

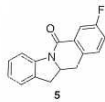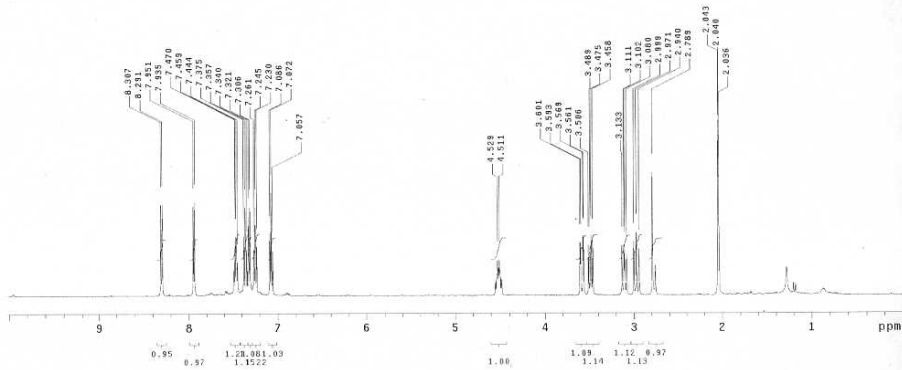

STANDARD CARBON PARAMETERS  
 Pulse Sequence: s2pul  
 Solvent: CDCl3  
 Ambient Temperature  
 User: j-14-87  
 INOVA-500 "tocsy.chem.buffalo.edu"  
 Relax: delay 6.000 sec  
 Pulse: 81.8 degrees  
 Acq. Time: 1.308 sec  
 Width: 37007.0 Hz  
 5688 repetitions  
 OBSERVE: C13, 125.6395503 MHz  
 DECOUPLE: H1, 499.9008903 MHz  
 Power: 40 dB  
 continuously on  
 WALTZ-16 modulated  
 DATA PROCESSING  
 Line broadening: 0.5 Hz  
 FT size: 131072  
 Total Time: 16 hr, 15 min, 3 sec

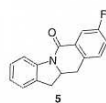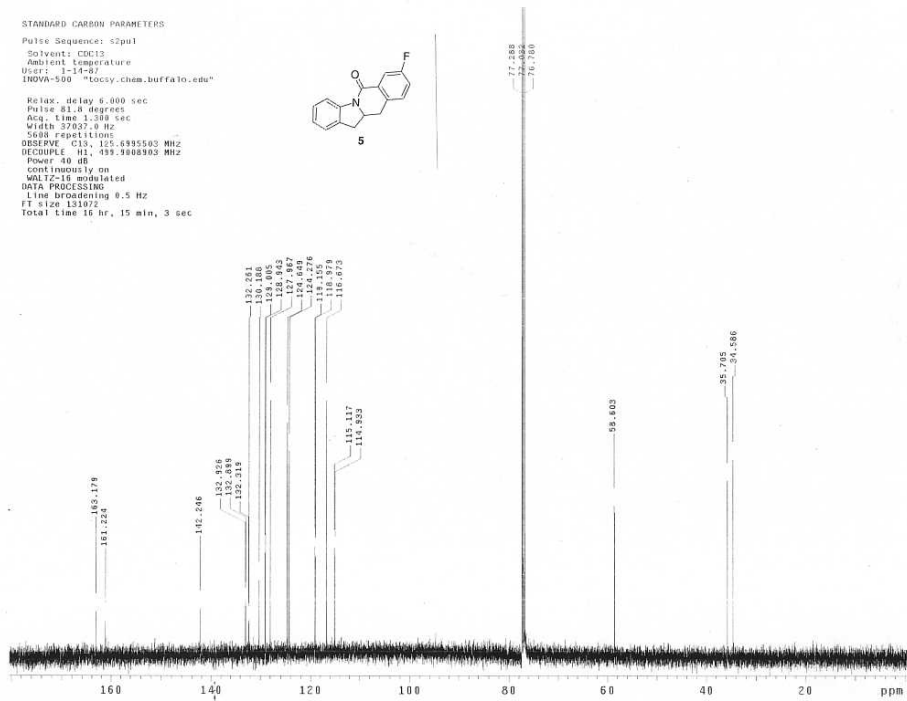

phf372-pu183716-37\_013  
 Pulse Sequence: zgpg30  
 Solvent: CDCl3  
 Ambient Temperature  
 INOVA-500 "tocsy.chem.buffalo.edu"  
 Relax\_delay 2.000 sec  
 Pulse 34.8 degree  
 Acq. Time 1.091 sec  
 Width 18100.0 Hz  
 16 repetitions  
 OBSERVE F1 499.898458 MHz  
 DATA PROCESSING  
 Line Broadening 0.7 Hz  
 FT Size 65528  
 Total Time 1 min, 18 sec

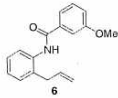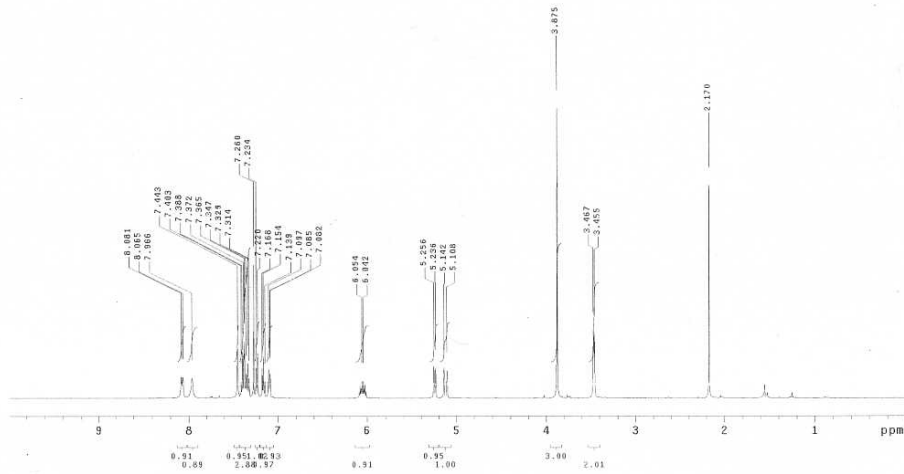

STANDARD CARBON PARAMETERS  
 Pulse Sequence: zgpg30  
 Solvent: CDCl3  
 Ambient Temperature  
 User: 1-11-97  
 INOVA-500 "tocsy.chem.buffalo.edu"

Relax\_delay 5.000 sec  
 Pulse 91.3 degree  
 Acq. Time 1.300 sec  
 Width 27437.4 Hz  
 254 repetitions  
 OBSERVE G13 125.6995063 MHz  
 DECPMPC H1 499.9089963 MHz  
 Power 40 dB  
 Continuously on  
 WALTZ-16 modulated  
 DATA PROCESSING  
 Line Broadening 0.5 Hz  
 FT Size 121872  
 Total Time 1 hr, 2 min, 51 sec

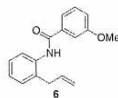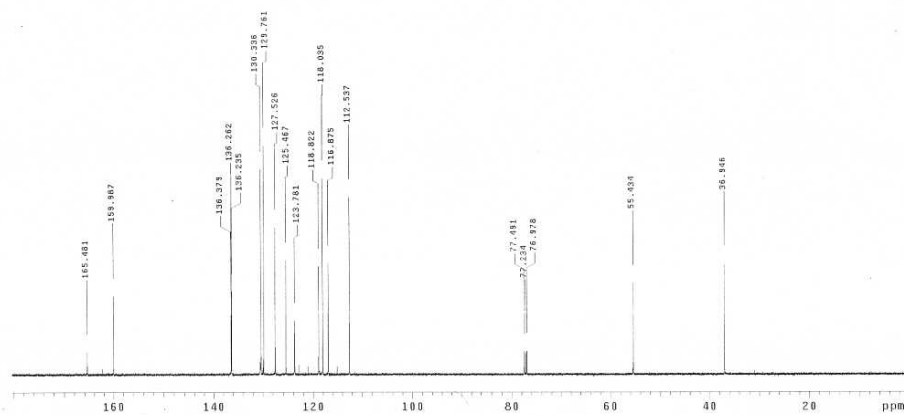

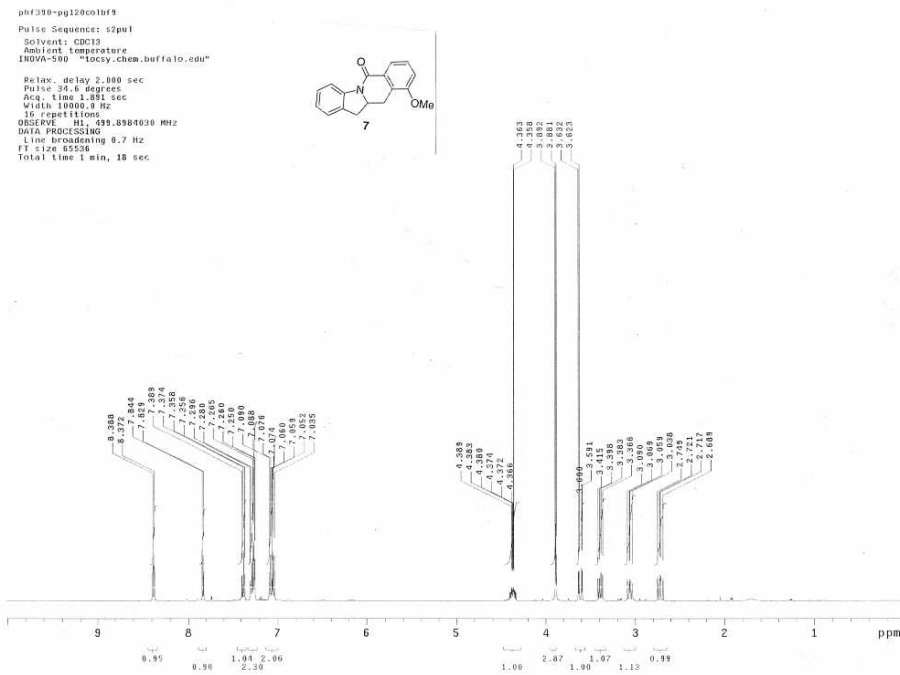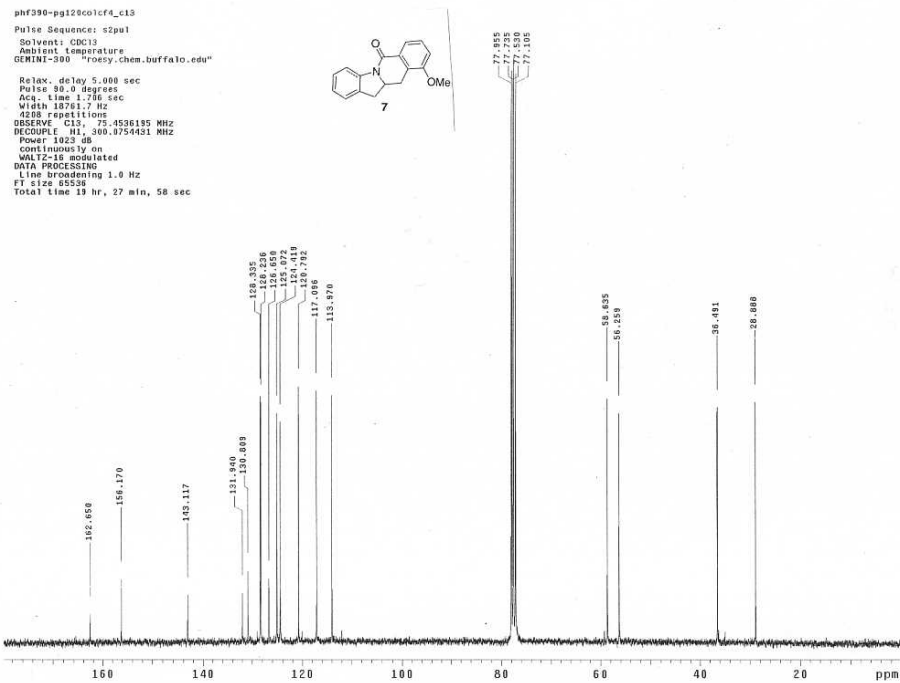

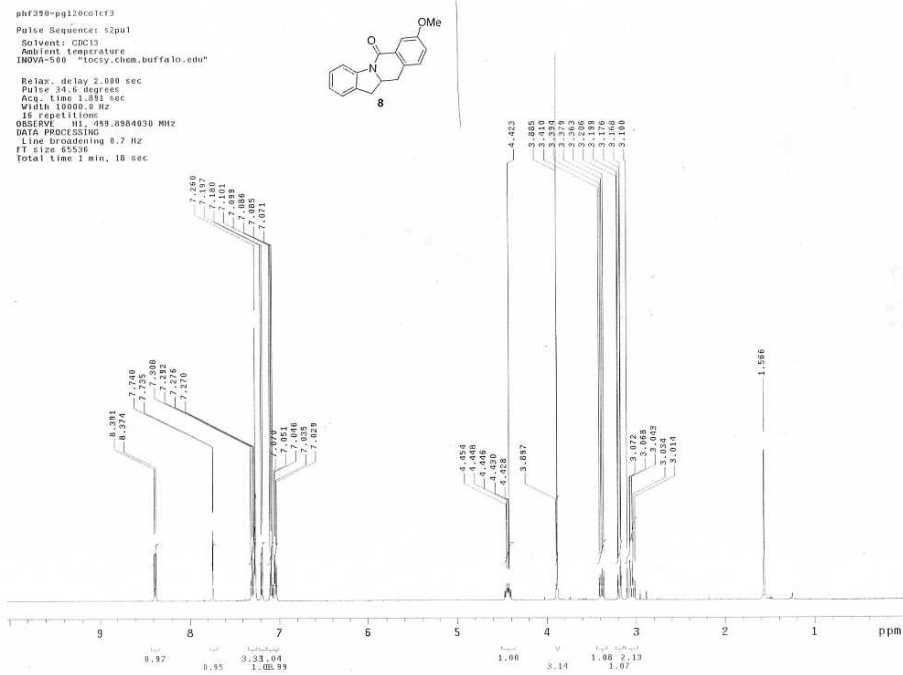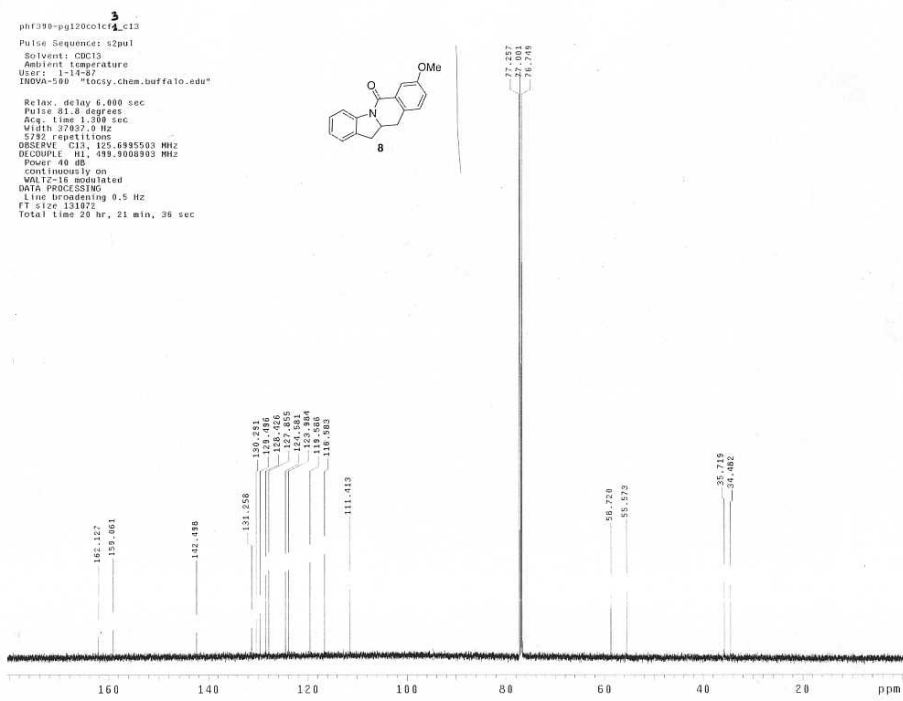



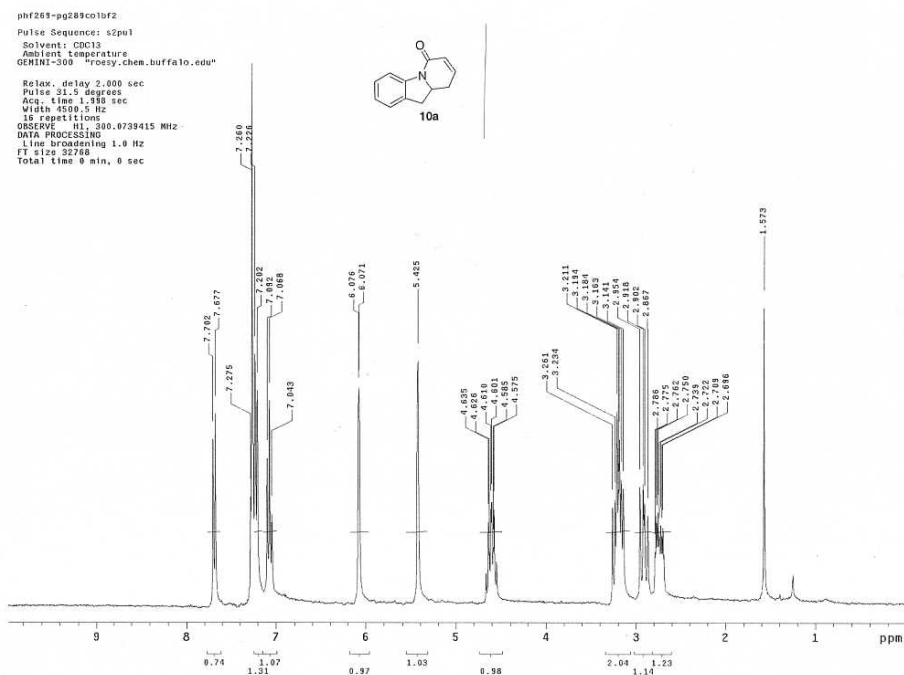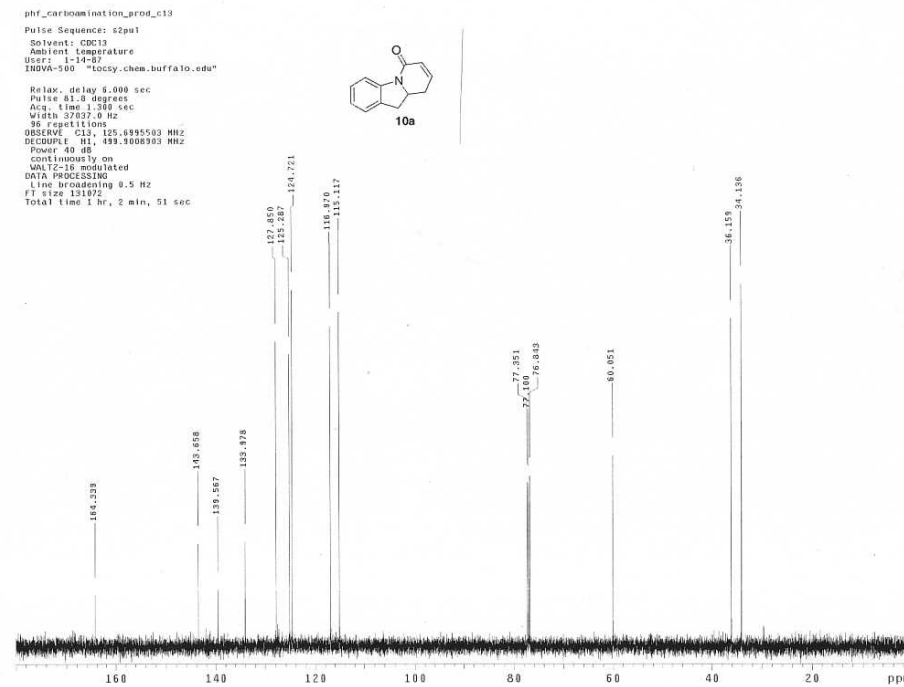

phf256-pg0717-8  
 Pulse Sequence: s2pul  
 Solvent: CDCl3  
 Ambient Temperature  
 INOVA-500 "tccy.chem.buffalo.edu"  
 Relax. delay 2.000 sec  
 Pulse 24.0 degrees  
 Acq. time 1.891 sec  
 Width 10000.0 Hz  
 16 repetitions  
 OBSERVE H1 499.8984058 MHz  
 DATA PROCESSING  
 Line broadening 0.7 Hz  
 FT size 65536  
 Total time 1 min, 18 sec

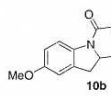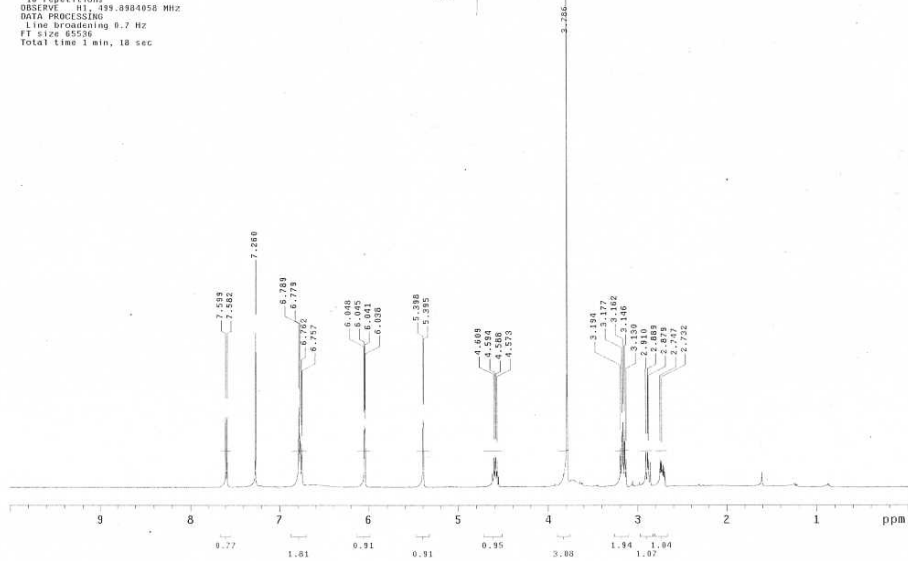

phf256-pg0717-8  
 Pulse Sequence: s2pul  
 Solvent: CDCl3  
 Ambient Temperature  
 User: j-18-87  
 INOVA-500 "tccy.chem.buffalo.edu"  
 Relax. delay 6.000 sec  
 Pulse 81.8 degrees  
 Acq. time 1.300 sec  
 Width 37807.0 Hz  
 8248 repetitions  
 OBSERVE C13 125.6955583 MHz  
 DECOUPLE H1 499.8984983 MHz  
 Power 48 dB  
 continuously on  
 MALTZ-16 modulator  
 DATA PROCESSING  
 Line broadening 0.5 Hz  
 FT size 131972  
 Total time 20 hr, 21 min, 36 sec

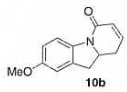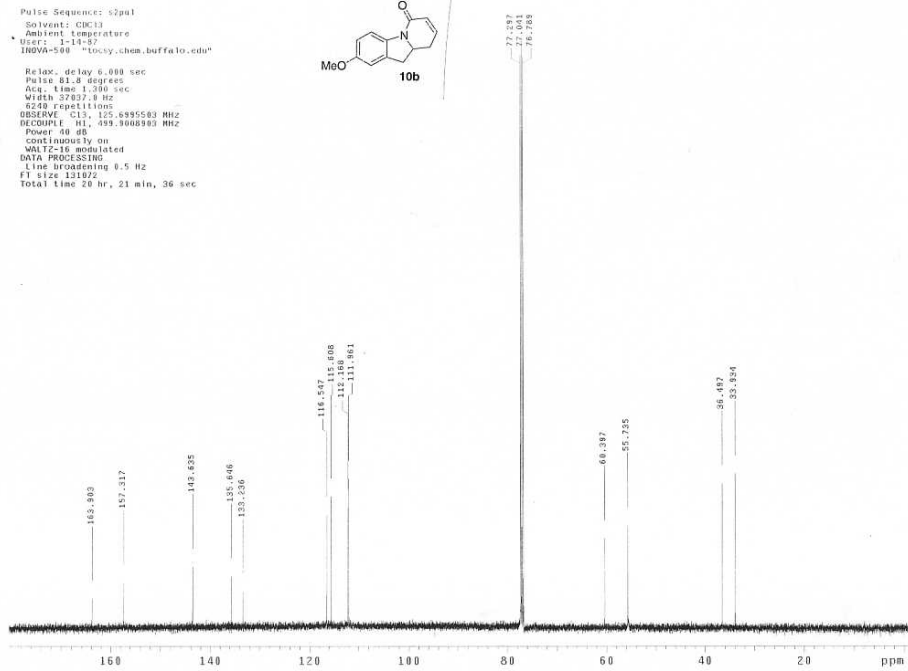

ph576-pg16f1-2  
 Pulse Sequence: s2pul  
 Solvent: CDCl3  
 Ambient temperature  
 INOVA-500 "ccsy.chem.buffalo.edu"  
 Relax. delay 1.000 sec  
 Pulse 46.9 degrees  
 Acq. time 1.500 sec  
 Width 6000.0 Hz  
 IG repetition  
 OBSERVE\_H1 499.8381684 MHz  
 DATA PROCESSING  
 Line broadening 0.3 Hz  
 FT size 32768  
 Total time 0 min, 44 sec

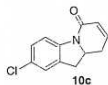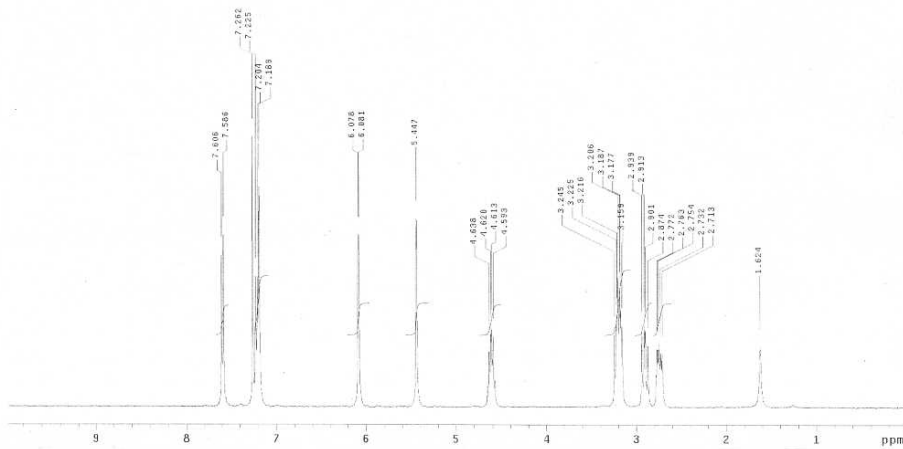

ph576-pg16f3-1\_c13  
 Pulse Sequence: s2pul  
 Solvent: CDCl3  
 Ambient temperature  
 User: j-14-87  
 INOVA-500 "ccsy.chem.buffalo.edu"  
 Relax. delay 0.800 sec  
 Pulse 81.8 degrees  
 Acq. time 1.500 sec  
 Width 57807.0 Hz  
 8568 repetitions  
 OBSERVE\_C13 125.6995583 MHz  
 DECOUPLE\_H1 499.8008903 MHz  
 Power 40 dB  
 continuously on  
 WALTZ-16 modulated  
 DATA PROCESSING  
 Line broadening 0.5 Hz  
 FT size 131072  
 Total time 20 hr, 21 min, 36 sec

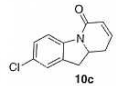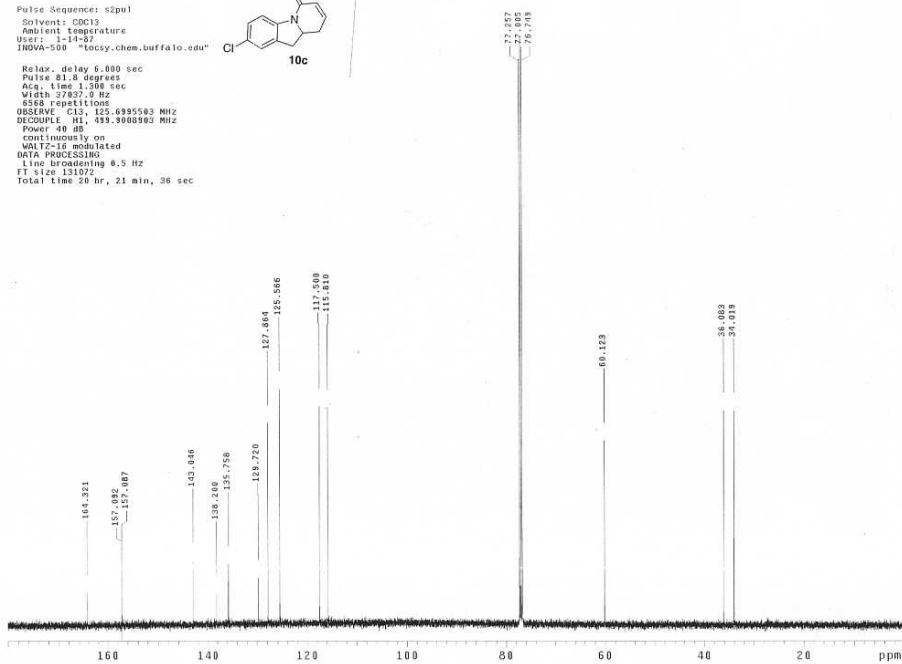

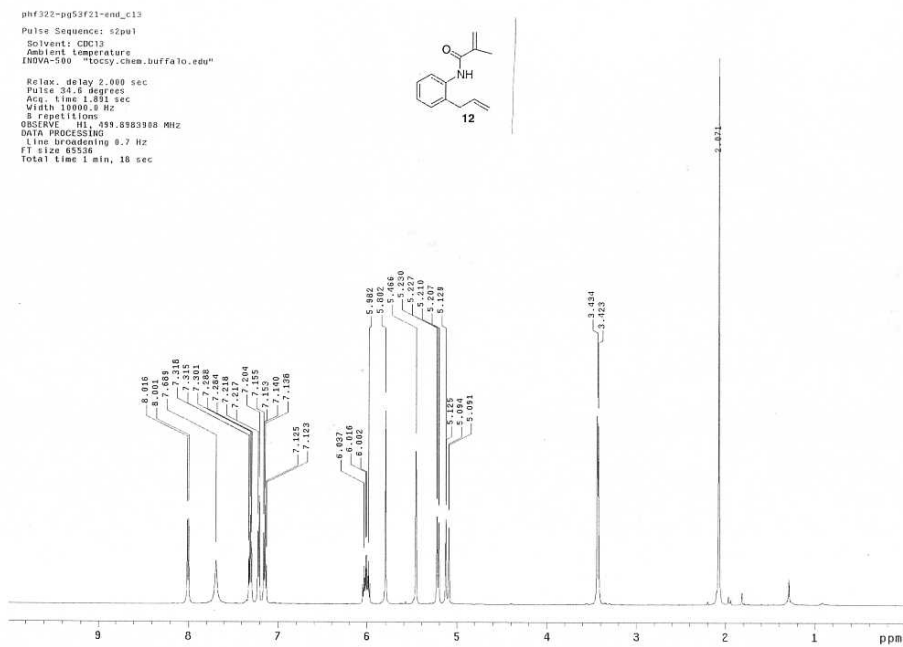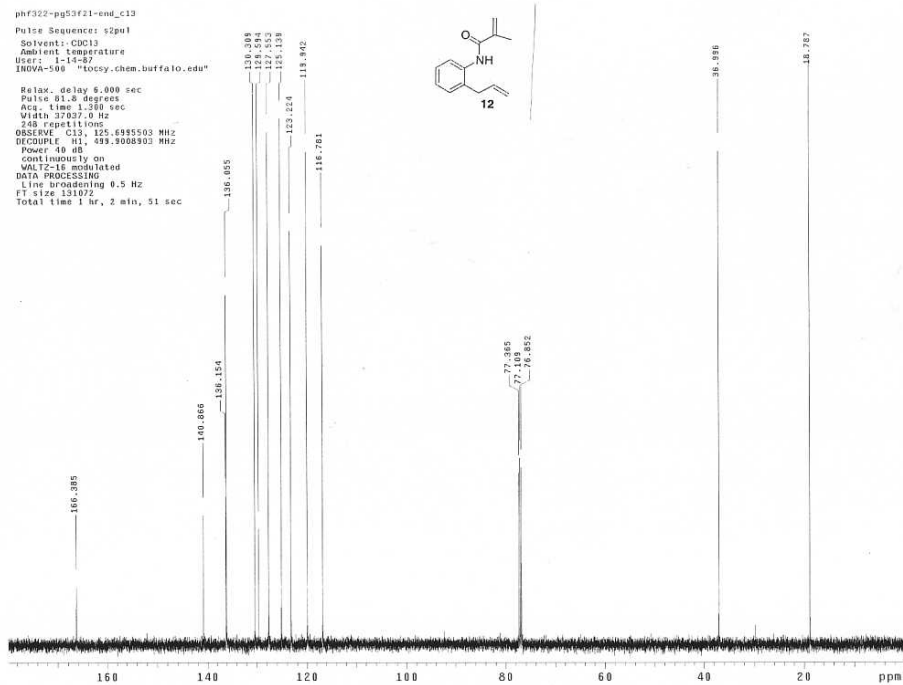

phf332-pg64colbf2  
 Pulse Sequence: s2pu1  
 Solvent: CDCl3  
 Ambient Temperature  
 QMNH-300 rosys.chem.buffalo.edu\*

Relax. delay 1.800 sec  
 Pulse 31.5 degrees  
 Acq. time 1.950 sec  
 Width 4500.5 Hz  
 16 repetitions  
 OBSERVE H1 300.0739432 MHz  
 DATA PROCESSING  
 Line broadening 1.0 Hz  
 FT size 32768  
 Total time 1 min, 31 sec

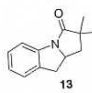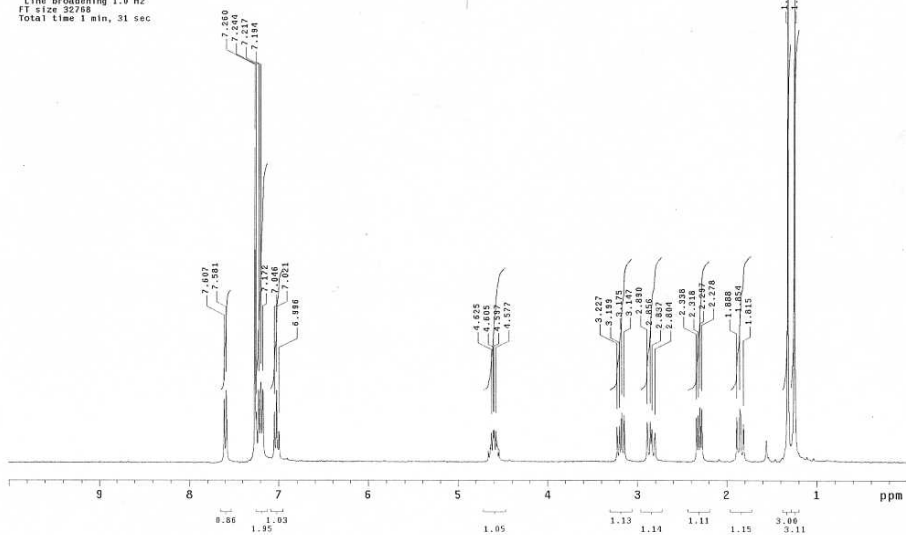

13C OBSERVE  
 Pulse Sequence: s2pu1  
 Solvent: CDCl3  
 Ambient Temperature  
 QMNH-300 rosys.chem.buffalo.edu\*

Relax. delay 5.000 sec  
 Pulse 90.0 degrees  
 Acq. time 1.700 sec  
 Width 18761.7 Hz  
 4384 repetitions  
 OBSERVE C13 75.4536195 MHz  
 DECOUPLE H1 300.0754431 MHz  
 Power 1023 db  
 continuously on  
 MULTIZ-16 modulated  
 DATA PROCESSING  
 Line broadening 1.0 Hz  
 FT size 65536  
 Total time 19 hr, 27 min, 58 sec

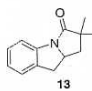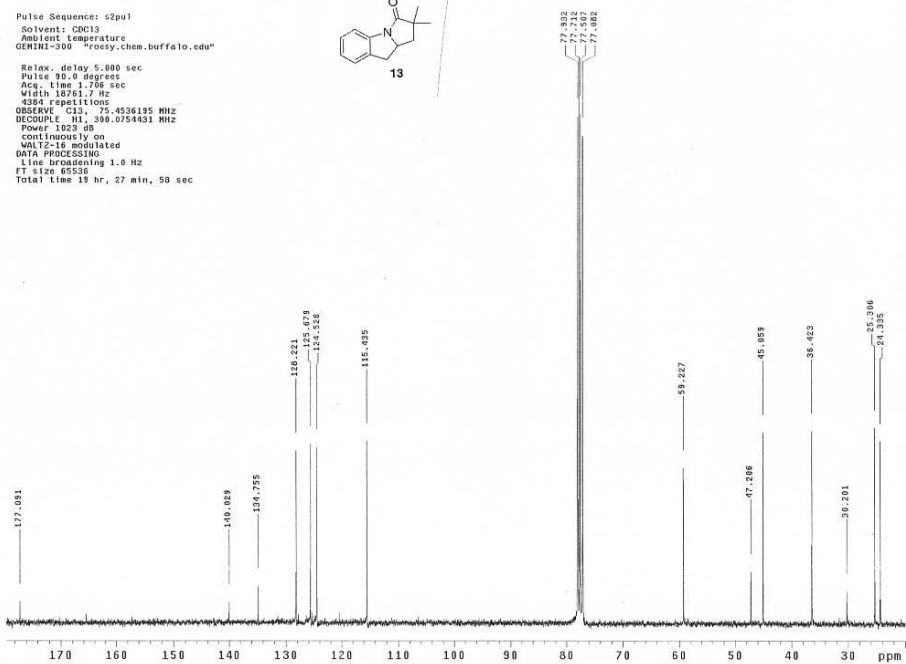

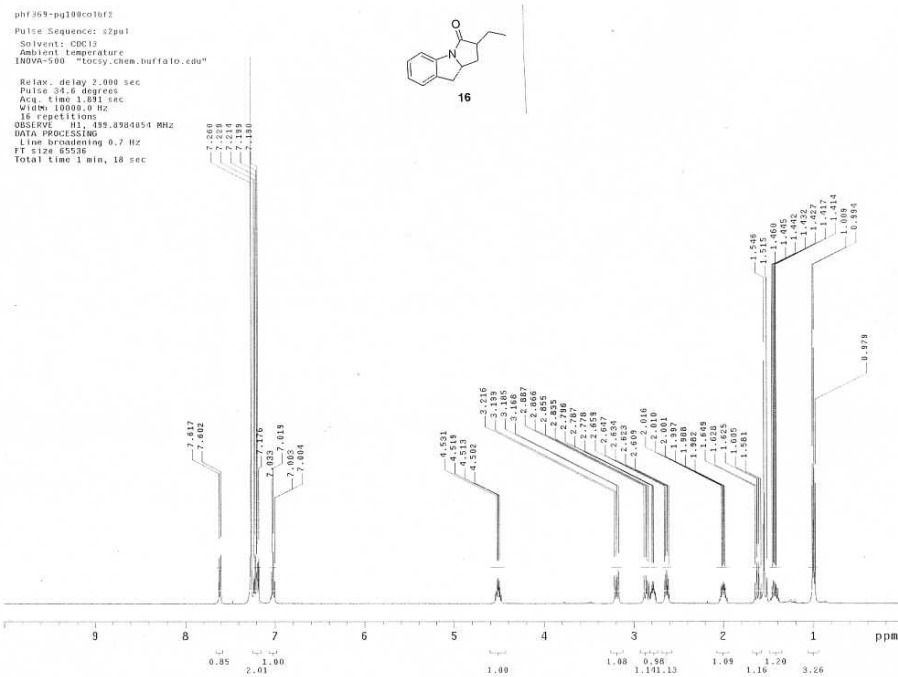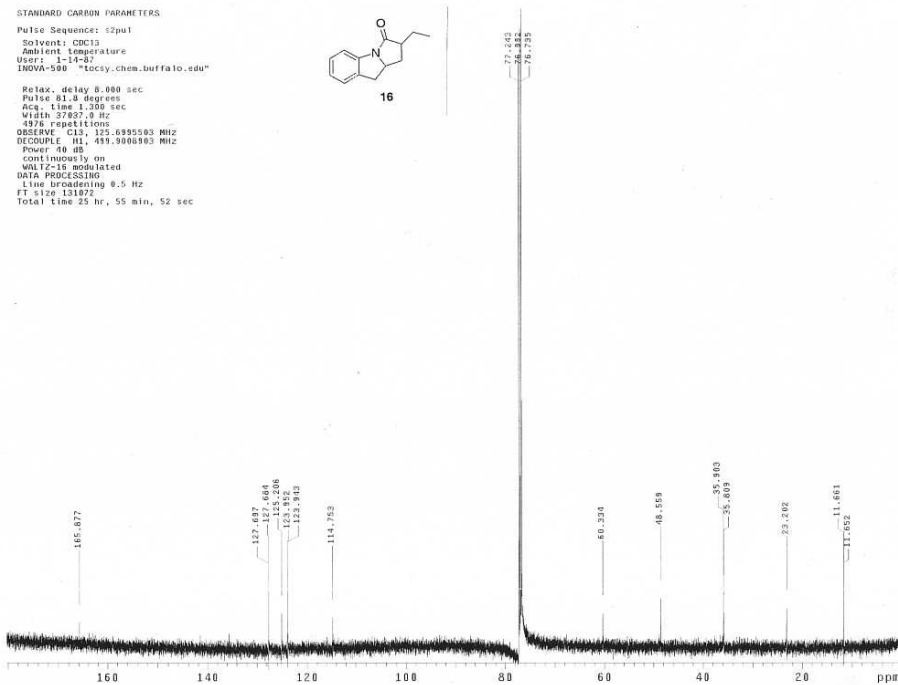

phf443-pg173f32-36  
 Pulse Sequence: s2pul  
 Solvent: CDCl3  
 Ambient Temperature  
 INOVA-300 "roesy.chem.buffalo.edu"  
 Relax. delay 2.000 sec  
 Pulse 34.0 degrees  
 Acq. time 1.891 sec  
 Width 10000.0 Hz  
 IS repetitions  
 OBSERVE H1, 499.8984030 MHz  
 DATA PROCESSING  
 Line broadening 6.7 Hz  
 FT size 65536  
 Total time 1 min, 18 sec

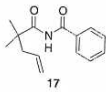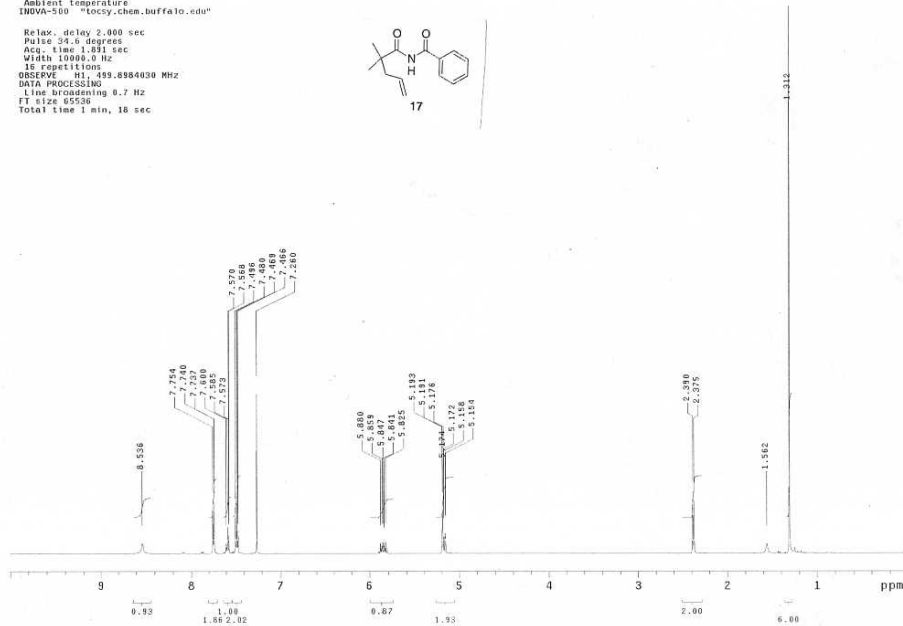

phf449-pg173f49-65\_c13  
 Pulse Sequence: s2pul  
 Solvent: CDCl3  
 Ambient Temperature  
 GEMINI-300 "roesy.chem.buffalo.edu"  
 Relax. delay 5.000 sec  
 Pulse 90.0 degrees  
 Acq. time 1.716 sec  
 Width 18761.7 Hz  
 IS repetitions  
 OBSERVE C13, 75.4536195 MHz  
 DECOUPLE H1, 400.0754431 MHz  
 Power 1023 dB  
 continuously on  
 MALTZ-16 modulated  
 DATA PROCESSING  
 Line broadening 1.0 Hz  
 FT size 65536  
 Total time 1 hr, 59 min, 57 sec

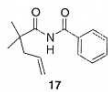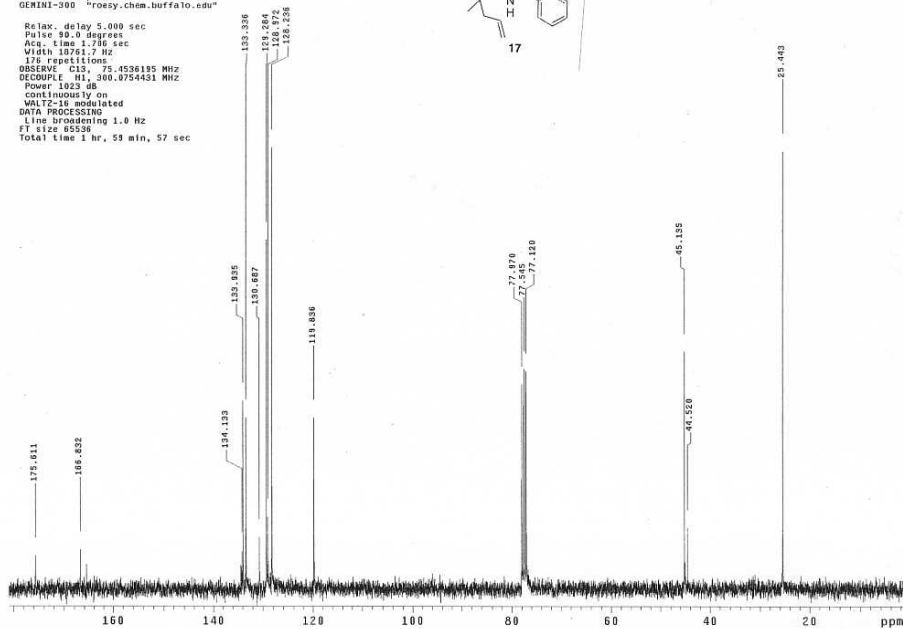

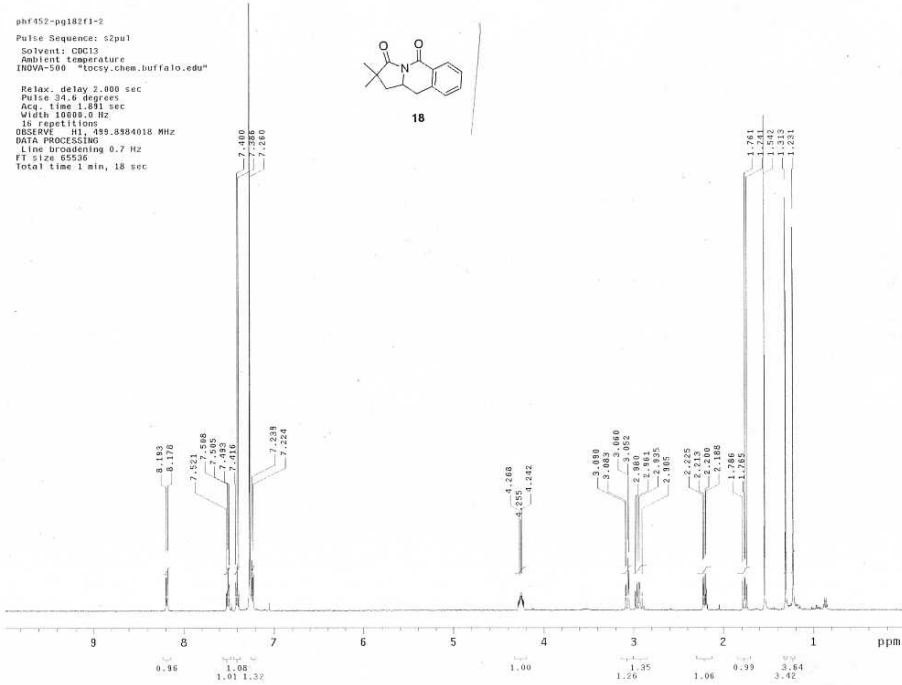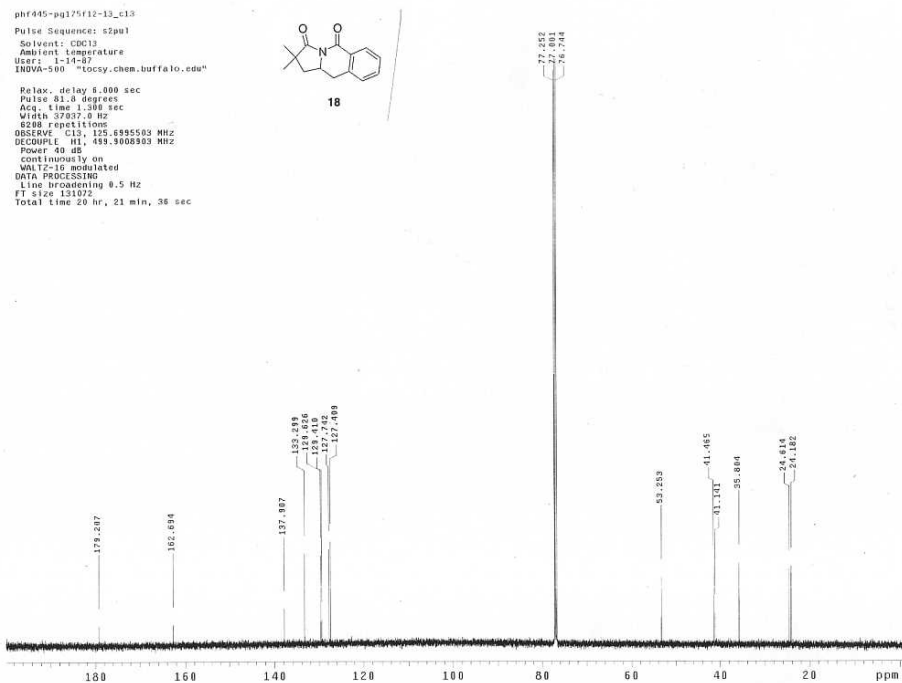



mystery  
 Pulse Sequence: s2pul  
 Solvent: CDCl3  
 Ambient Temperature  
 GEMINI-300 "roesy.chem.buffalo.edu"  
 Relax. delay 2.000 sec  
 Pulse 31.5 degrees  
 Acq. time 1.938 sec  
 Width 4590.5 Hz  
 18 repetitions  
 OBSERVE H1, 300.0739429 MHz  
 DATA PROCESSING  
 Line broadening 1.0 Hz  
 FT size 32768  
 Total time 0 min, 0 sec

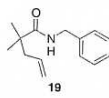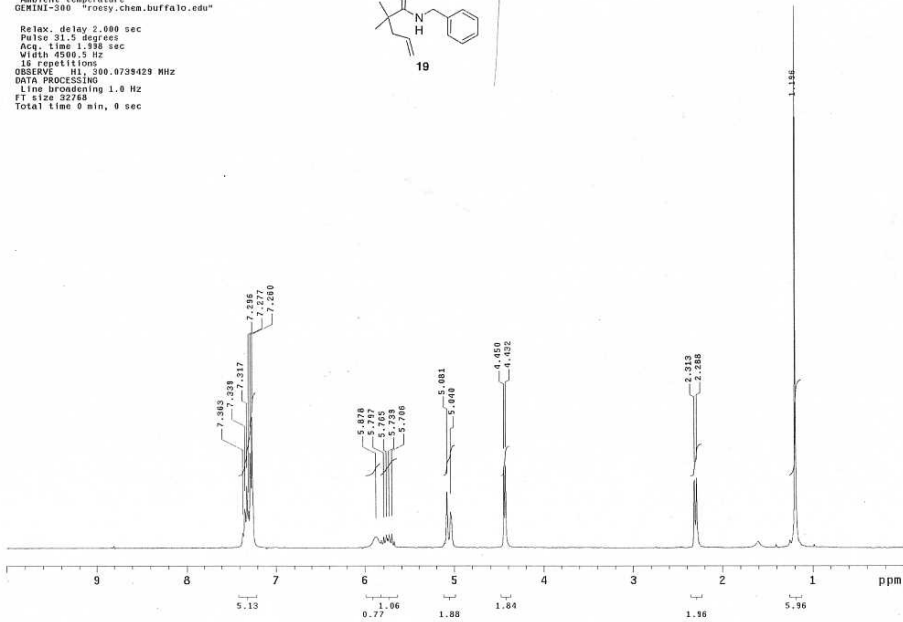

phf458-pg189f8-18\_c13  
 Pulse Sequence: s2pul  
 Solvent: CDCl3  
 Ambient Temperature  
 GEMINI-300 "roesy.chem.buffalo.edu"  
 Relax. delay 5.000 sec  
 Pulse 90.0 degrees  
 Acq. time 1.758 sec  
 Width 18761.7 Hz  
 32 repetitions  
 OBSERVE C13, 75.4526195 MHz  
 DECOUPLE H1, 300.0754431 MHz  
 Power 1023 dB  
 continuously on  
 MALTZ-10 modulated  
 DATA PROCESSING  
 Line broadening 1.0 Hz  
 FT size 85536  
 Total time 1 hr, 59 min, 57 sec

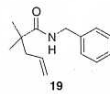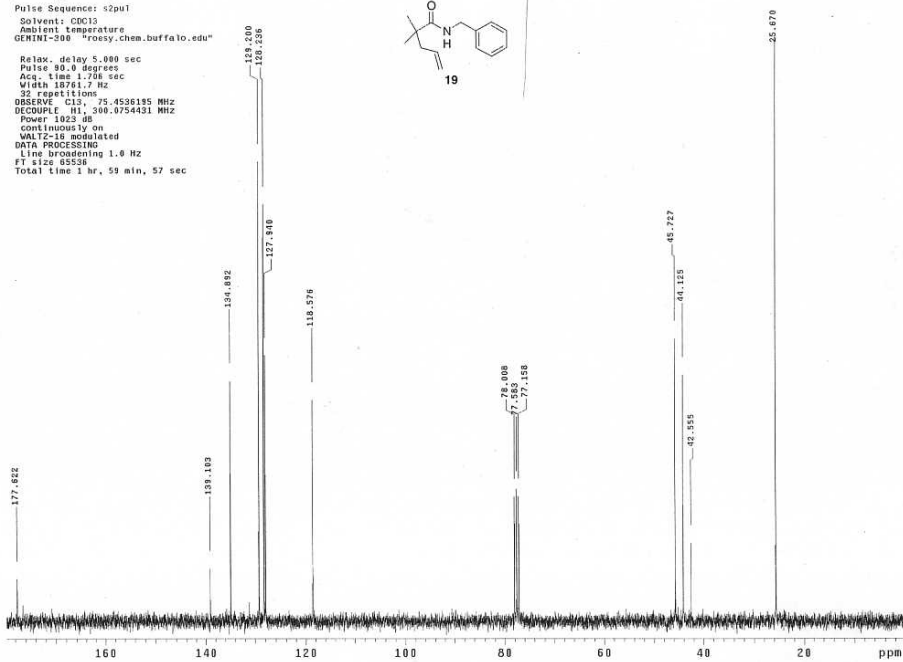

STANDARD 1H OBSERVE

Pulse Sequence: s2pul  
 Solvent: CDCl3  
 Ambient Temperature  
 GEMINI-300 "roesy.chem.buffalo.edu"  
 Relax. delay 2.000 sec  
 Pulse 31.5 degrees  
 Acq. time 1.938 sec  
 Width 4500.5 Hz  
 4 Repetitions  
 OBSERVE H1: 300.0739424 MHz  
 DATA PROCESSING  
 Line broadening 1.0 Hz  
 FT size 32768  
 Total time 0 min, 0 sec

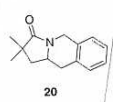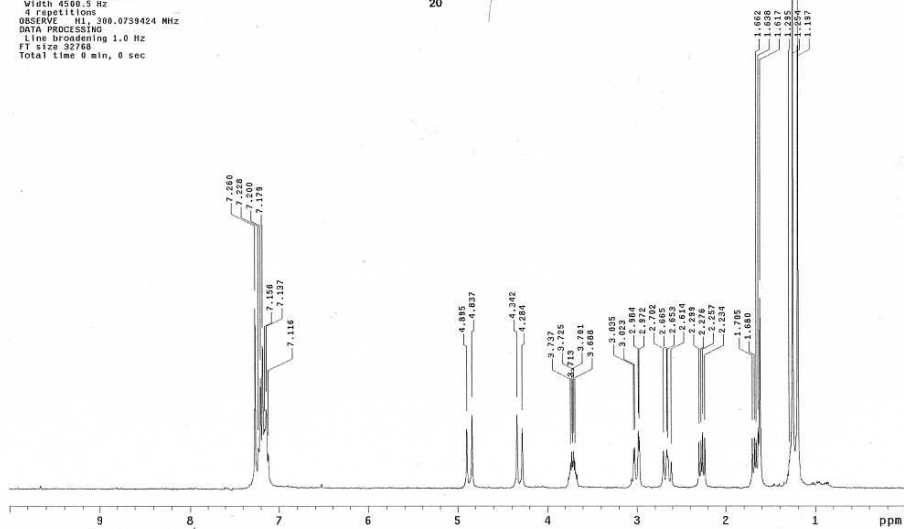

phf471-pg201f10-11

Pulse Sequence: s2pul  
 Solvent: CDCl3  
 Ambient Temperature  
 GEMINI-300 "roesy.chem.buffalo.edu"  
 Relax. delay 5.000 sec  
 Pulse 90.0 degrees  
 Acq. time 1.746 sec  
 Width 18761.7 Hz  
 2556 Repetitions  
 OBSERVE C13: 75.4536195 MHz  
 DECOUPLE H1: 300.0739431 MHz  
 Power 1023 dB  
 continuously on  
 MALTZ-16 modulated  
 DATA PROCESSING  
 Line broadening 1.0 Hz  
 FT size 85528  
 Total time 19 hr, 27 min, 58 sec

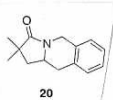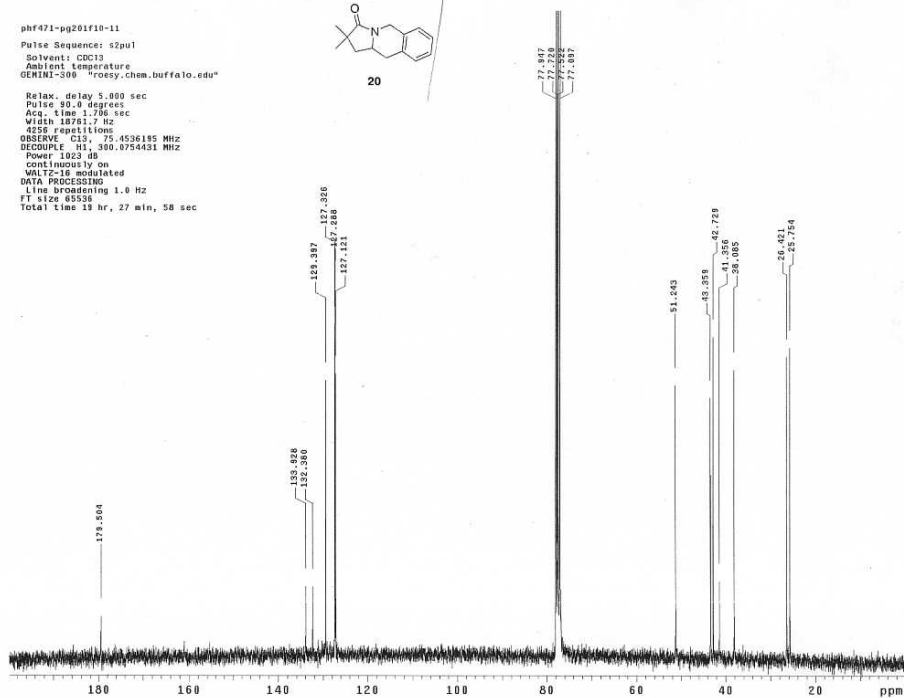

STANDARD PROTON PARAMETERS  
 Pulse Sequence: s2pul  
 Solvent: CDCl3  
 Ambient Temperature  
 INOVA-500 \*tscy.chem.buffalo.edu\*

Relax. delay 2.000 sec  
 Pulse 21.0 degrees  
 Acq. time 1.691 sec  
 Width 19999.0 Hz  
 8 repetitions  
 OBSERVE H1, 499.8363908 MHz  
 DATA PROCESSING  
 Line broadening 0.7 Hz  
 FT size 65536  
 Total time 1 min, 18 sec

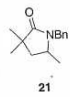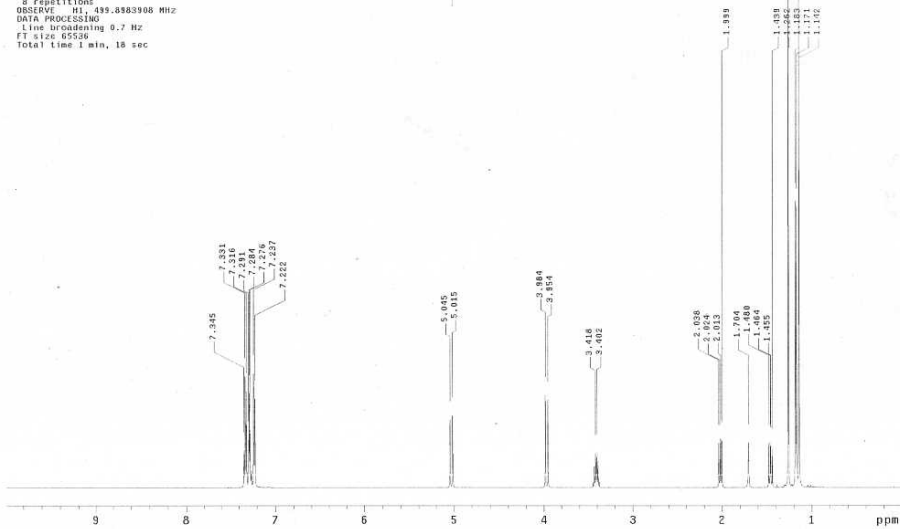

phf471-pg201f8-s\_c13  
 Pulse Sequence: s2pul  
 Solvent: CDCl3  
 Ambient Temperature  
 User: i-14-87  
 INOVA-500 \*tscy.chem.buffalo.edu\*

Relax. delay 6.000 sec  
 Pulse 81.0 degrees  
 Acq. time 1.300 sec  
 Width 37927.0 Hz  
 5328 repetitions  
 OBSERVE C13, 125.8955503 MHz  
 DECOUPLE H1, 499.9008903 MHz  
 Power 40 dB  
 continuously on  
 MALTZ-18 modulated  
 DATA PROCESSING  
 Line broadening 0.5 Hz  
 FT size 13192  
 Total time 20 hr, 21 min, 36 sec

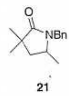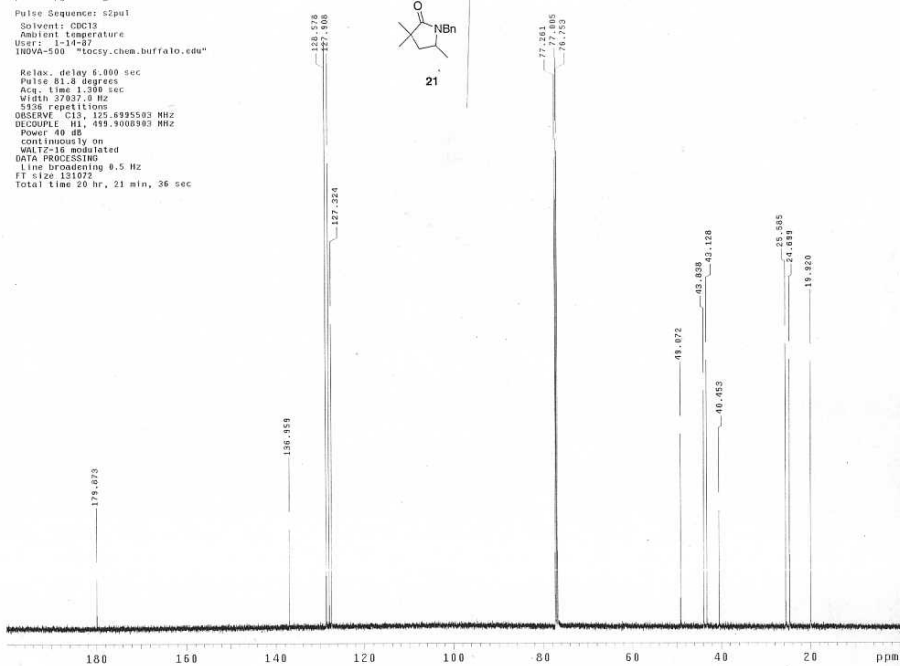

ph518-pg278c1c1  
 Pulse Sequence: s2pul  
 Solvent: CDCl3  
 Ambient Temperature  
 INOVA-500 "tccy.chem.buffalo.edu"  
 Relax. delay 2.000 sec  
 Pulse 24.4 degrees  
 Acq. time 1.031 sec  
 Width 10000.0 Hz  
 16 repetitions  
 OBSERVE H1, 499.8564027 MHz  
 DATA PROCESSING  
 Line broadening 0.7 Hz  
 FT size 65536  
 Total time 1 min, 18 sec

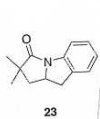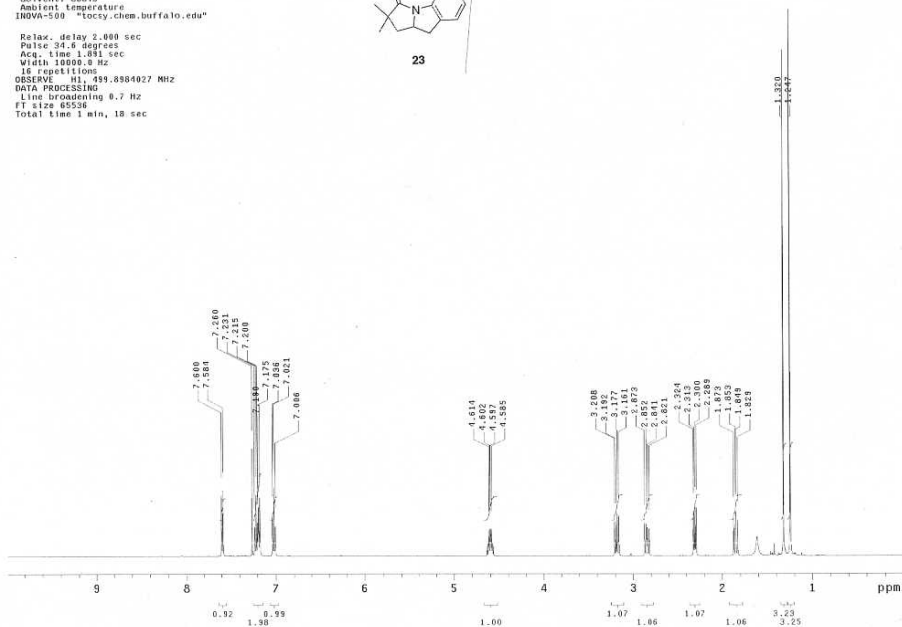

ph518-pg278c1c1\_c13  
 Pulse Sequence: s2pul  
 Solvent: CDCl3  
 Ambient Temperature  
 User: j-14-87  
 INOVA-500 "tccy.chem.buffalo.edu"  
 Relax. delay 0.000 sec  
 Pulse 81.0 degrees  
 Acq. time 1.300 sec  
 Width 37007.0 Hz  
 5560 repetitions  
 OBSERVE C13, 125.695503 MHz  
 DECOUPLE H1, 499.990893 MHz  
 Power 40 dB  
 continuously on  
 MLT2-16 modulated  
 DATA PROCESSING  
 Line broadening 0.5 Hz  
 FT size 131172  
 Total time 20 hr, 21 min, 36 sec

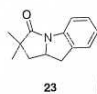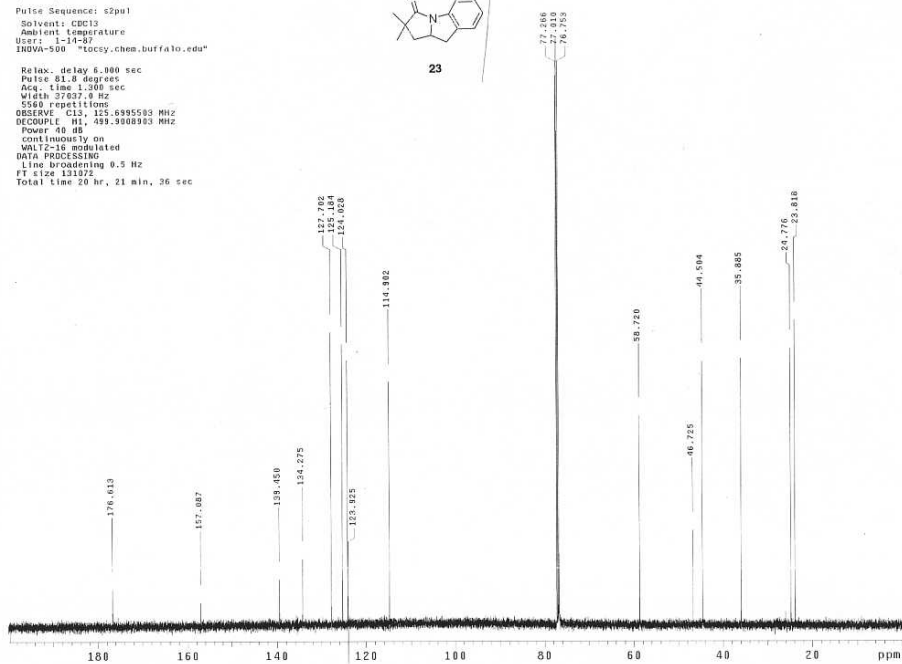

phf561-pg24f17-end  
 Pulse Sequence: s2pu1  
 Solvent: CDCl3  
 Ambient temperature  
 INOVA-500 "roesy.chem.buffalo.edu"  
 Relax. delay 2.000 sec  
 Pulse 24.8 degrees  
 Acq. time 1.891 sec  
 Width 11800.0 Hz  
 18 repetitions  
 OBSERVE H1, 499.8584030 MHz  
 DATA PROCESSING  
 Line broadening 0.7 Hz  
 FT size 65536  
 Total time 1 min, 16 sec

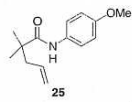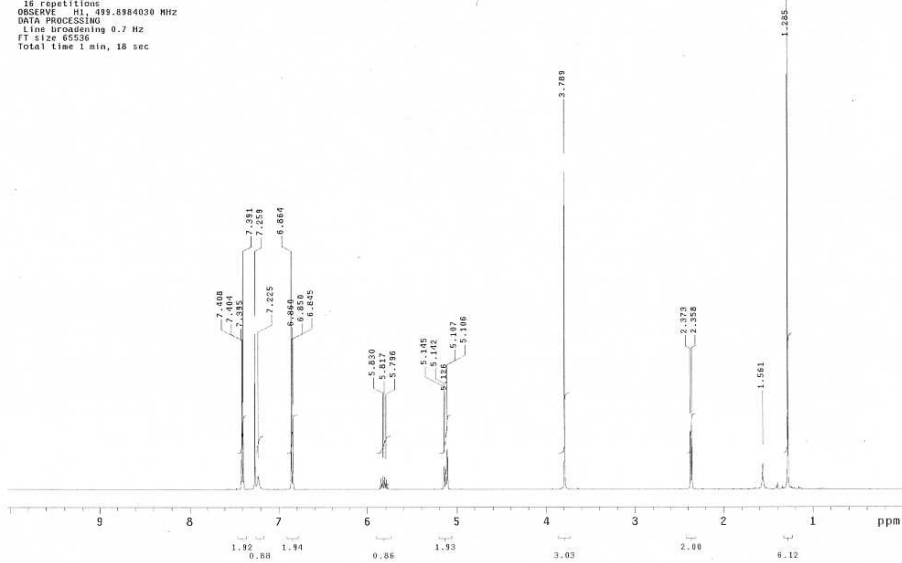

phf561-pg24f17-end\_c13  
 Pulse Sequence: s2pu1  
 Solvent: CDCl3  
 Ambient temperature  
 GEMINI-300 "roesy.chem.buffalo.edu"  
 Relax. delay 5.000 sec  
 Pulse 98.0 degrees  
 Acq. time 1.796 sec  
 Width 18761.7 Hz  
 18 repetitions  
 OBSERVE C13, 75.4536675 MHz  
 DECOUPLE H1, 300.8754431 MHz  
 Power 1023 dB  
 Continuously on  
 WALTZ-16 modulated  
 DATA PROCESSING  
 Line broadening 1.0 Hz  
 FT size 65536  
 Total time 1 hr, 5 min, 55 sec

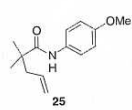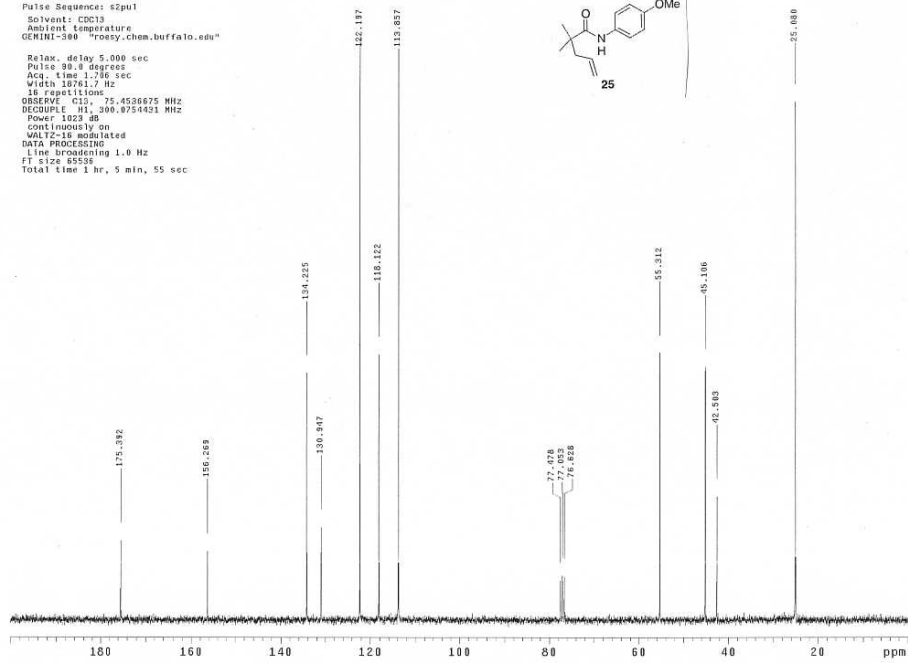

phf565-pg295f1-2  
 Pulse Sequence: zgpg30  
 Solvent: CDCl3  
 Ambient temperature  
 INOVA-500 "tocsy.chem.buffalo.edu"  
 Relax. delay 1.000 sec  
 Pulse 46.3 degrees  
 Acq. time 1.480 sec  
 Width 6000.6 Hz  
 16 repetitions  
 OBSERVE H1, 399.5288918 MHz  
 DATA PROCESSING  
 Line broadening 0.4 Hz  
 FI size 32768  
 Total time 9 min, 44 sec

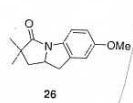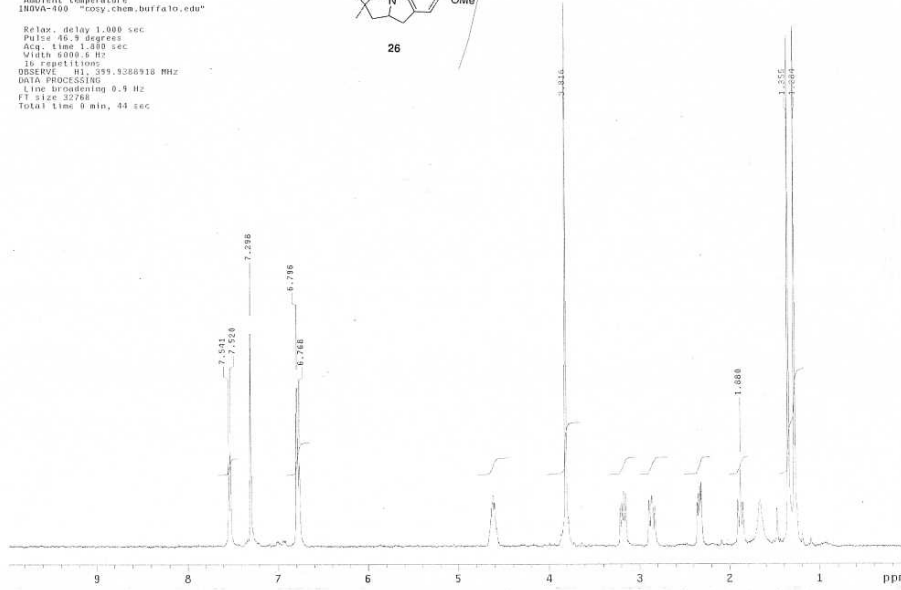

phf565-pg295f3-1-C13  
 Pulse Sequence: zgpg30  
 Solvent: CDCl3  
 Ambient temperature  
 Invt: 1-18-97  
 INOVA-500 "tocsy.chem.buffalo.edu"  
 Relax. delay 6.000 sec  
 Pulse 81.8 degrees  
 Acq. time 1.300 sec  
 Width 37837.8 Hz  
 6384 repetitions  
 OBSERVE C13, 125.6995583 MHz  
 DECOUPLE H1, 399.5089583 MHz  
 Power 48 dB  
 continuously on  
 WALTZ-16 modulated  
 DATA PROCESSING  
 Line broadening 0.5 Hz  
 FI size 131072  
 Total time 20 hr, 21 min, 36 sec

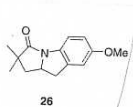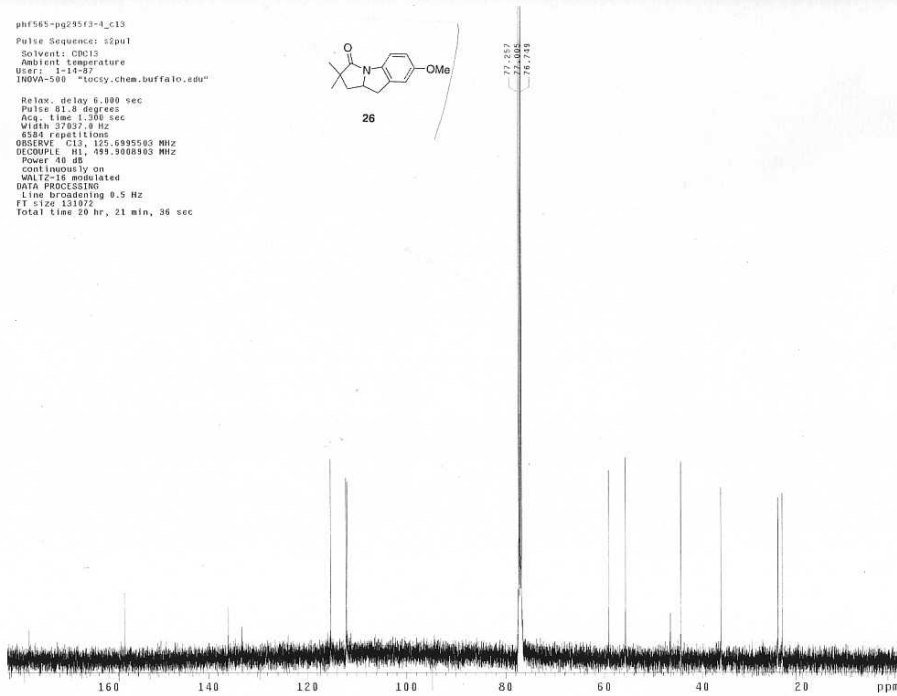

phf583-pg23c0bf1\_c13  
 Pulse Sequence: s2pul  
 Solvent: CDCl3  
 Ambient Temperature  
 INOVA-300 "tccy.chm.buffalo.edu"  
 Relax. delay 2.000 sec  
 Pulse 24.6 degrees  
 Acq. time 1.691 sec  
 Width 10000.0 Hz  
 18 repetitions  
 OBSERVE H1, 499.8384027 MHz  
 DATA PROCESSING  
 Line broadening 0.7 Hz  
 FT size 65536  
 Total time 1 min, 18 sec

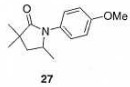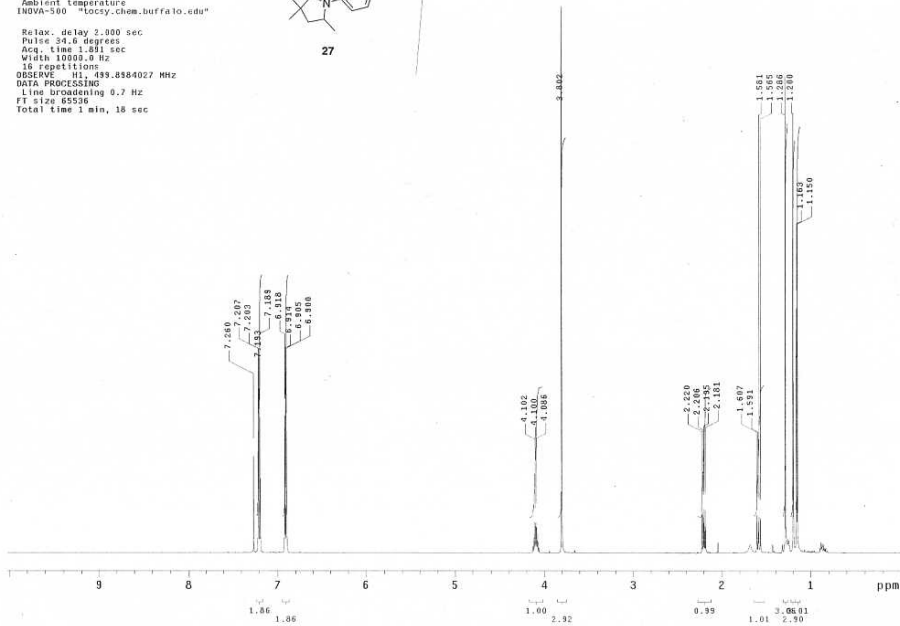

STANDARD CARBON PARAMETERS  
 Pulse Sequence: s2pul  
 Solvent: CDCl3  
 Ambient Temperature  
 User: j-14-87  
 INOVA-300 "tccy.chm.buffalo.edu"  
 Relax. delay 6.000 sec  
 Pulse 81.8 degrees  
 Acq. time 1.300 sec  
 Width 27927.0 Hz  
 8778 repetitions  
 OBSERVE C13, 125.6395503 MHz  
 DECOUPLE H1, 499.9808903 MHz  
 Power 48 dB  
 continuous on  
 WALTZ-16 modulated  
 DATA PROCESSING  
 Line broadening 0.5 Hz  
 FT size 131972  
 Total time 32 hr, 29 min, 36 sec

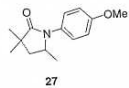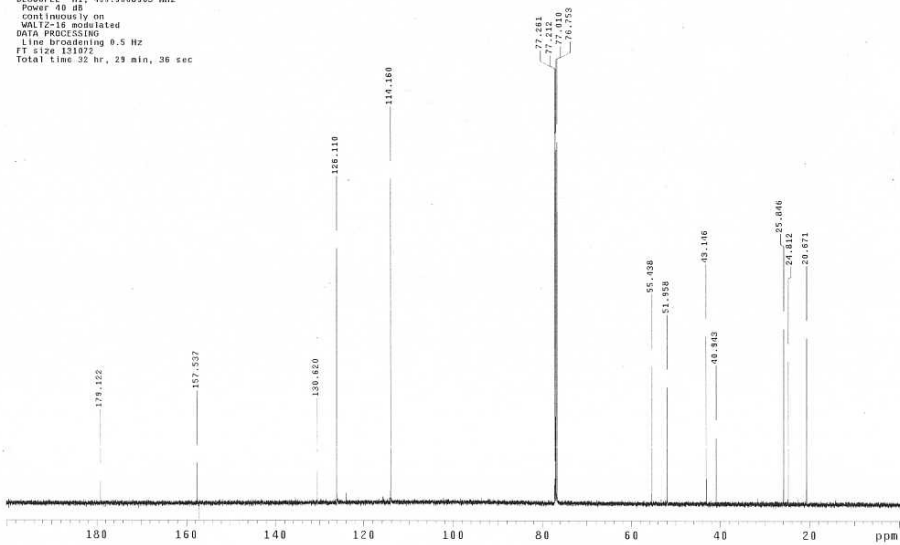

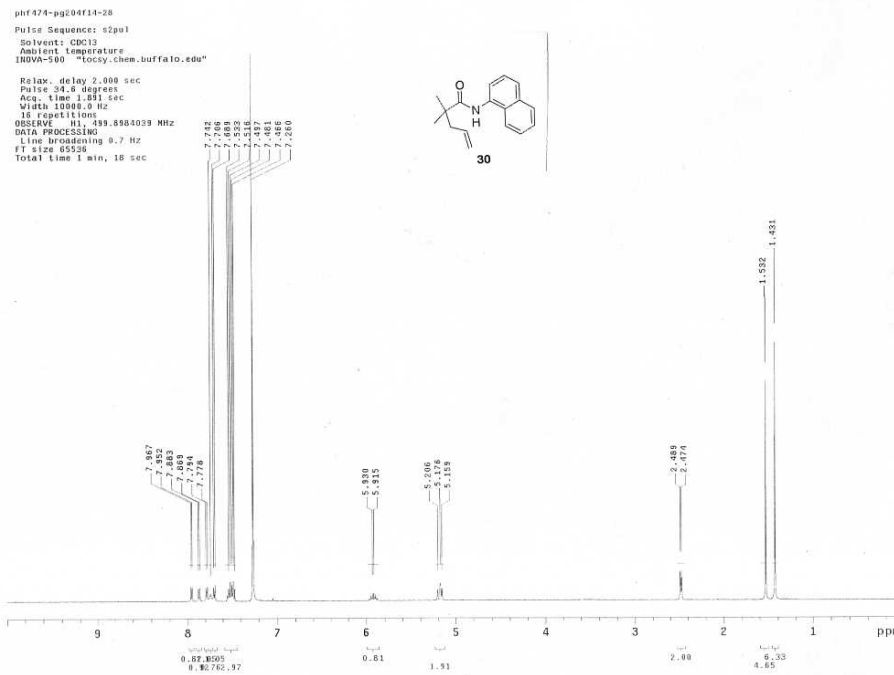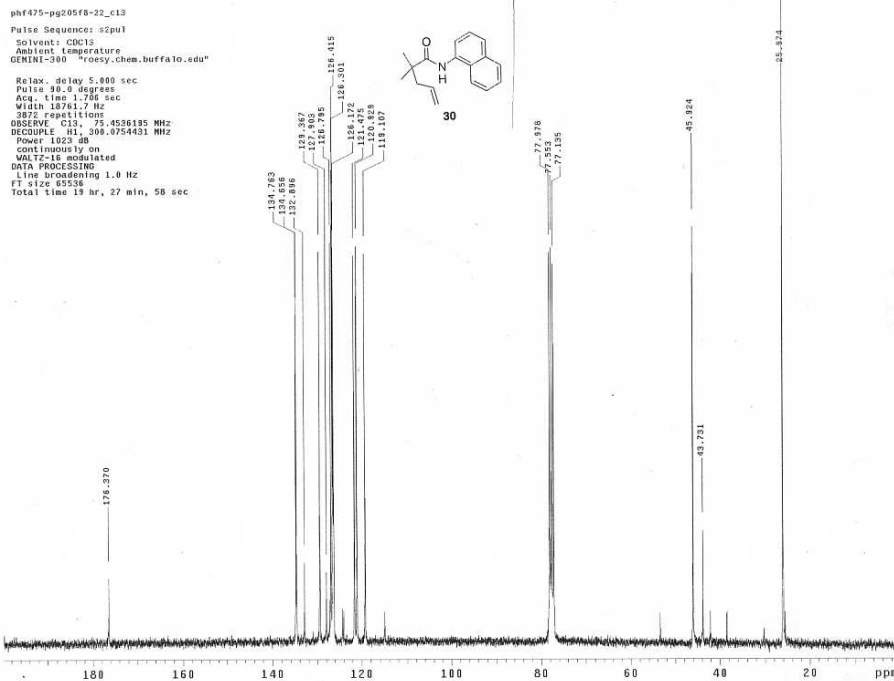



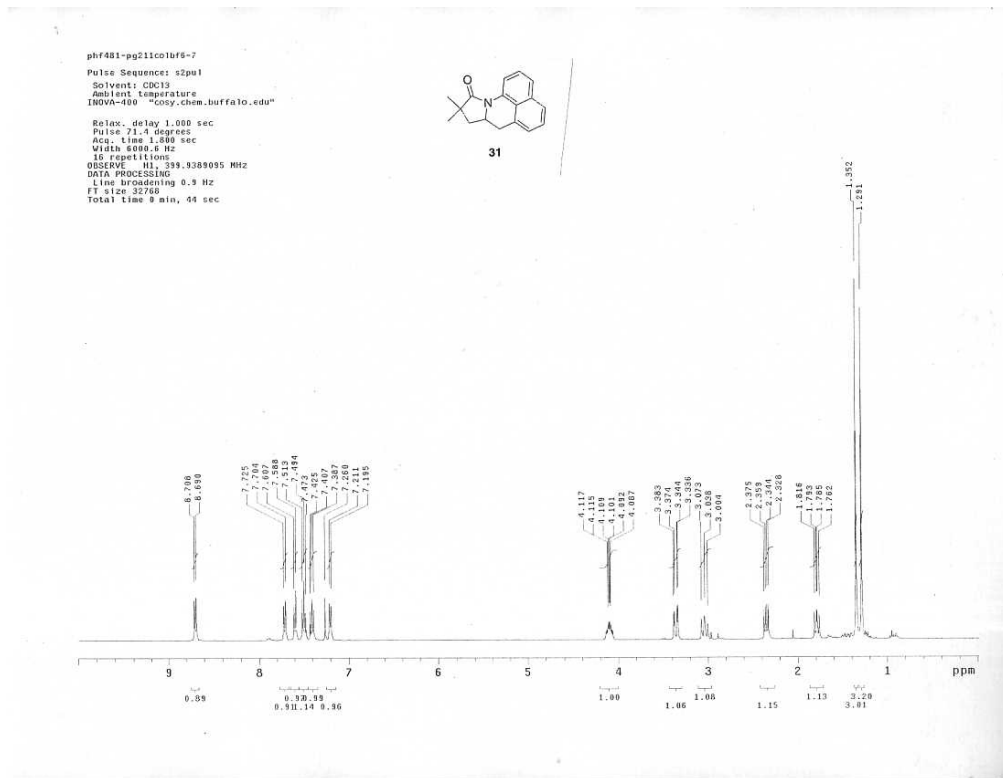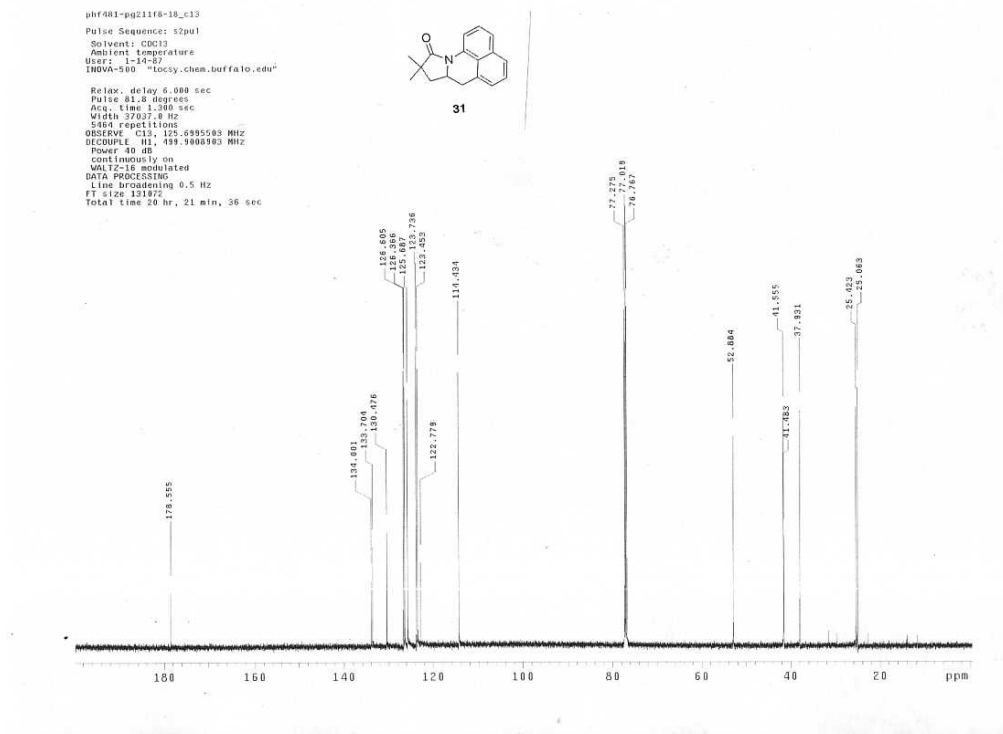



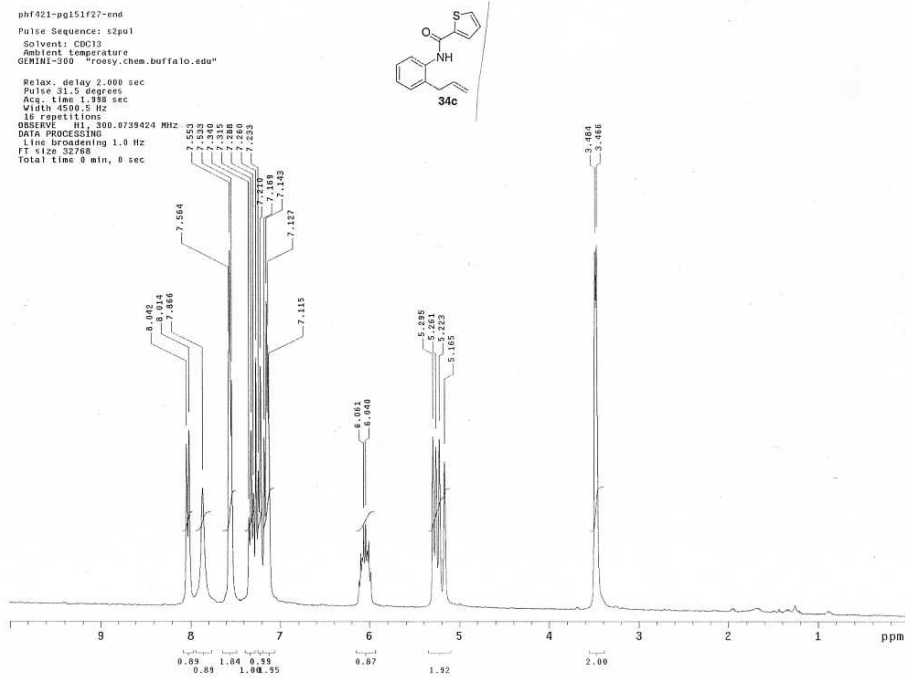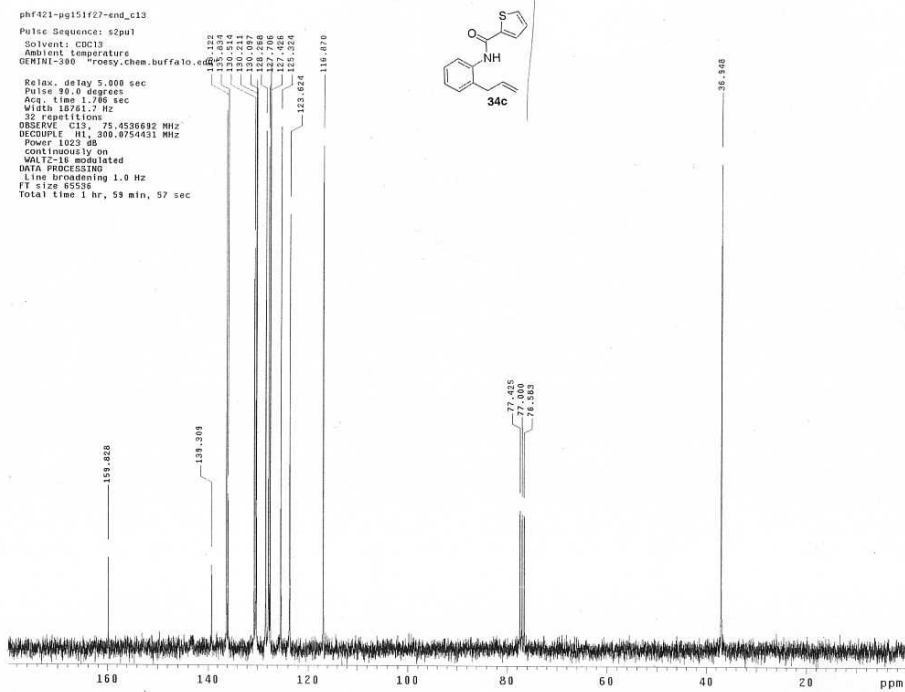

phf424-pg154colbf7-8  
 Pulse Sequence: s2pu1  
 Solvent: CDCl3  
 Ambient Temperature  
 INOVA-500 "tocsy.chem.buffalo.edu"  
 Relax. delay 2.000 sec  
 Pulse 24.6 degrees  
 Acq. time 1.891 sec  
 Width 10000.0 Hz  
 IS repetitions  
 OBSERVE H1, 499.8984030 MHz  
 DATA PROCESSING  
 Line broadening 0.7 Hz  
 FT size 85536  
 Total time 1 min, 15 sec

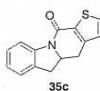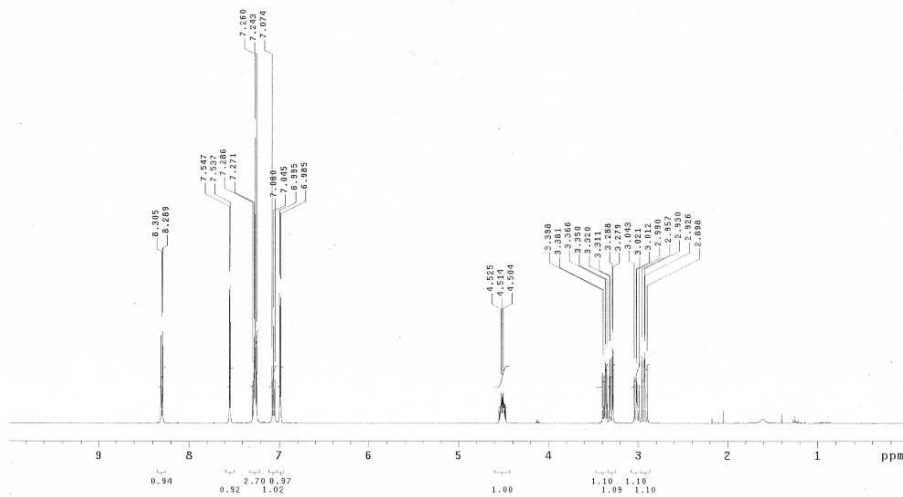

phf424-pg124colbf7-8\_c13  
 Pulse Sequence: s2pu1  
 Solvent: CDCl3  
 Ambient Temperature  
 Users: 1-11-87  
 INOVA-500 "tocsy.chem.buffalo.edu"  
 Relax. delay 6.000 sec  
 Pulse 81.0 degrees  
 Acq. time 1.360 sec  
 Width 37007.0 Hz  
 6128 repetitions  
 OBSERVE C13, 125.6685503 MHz  
 DECOUPLE H1, 499.9008903 MHz  
 Power 40 dB  
 continuously on  
 WALTZ-16 modulated  
 DATA PROCESSING  
 Line broadening 0.5 Hz  
 FT size 131022  
 Total time 20 hr, 21 min, 36 sec

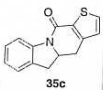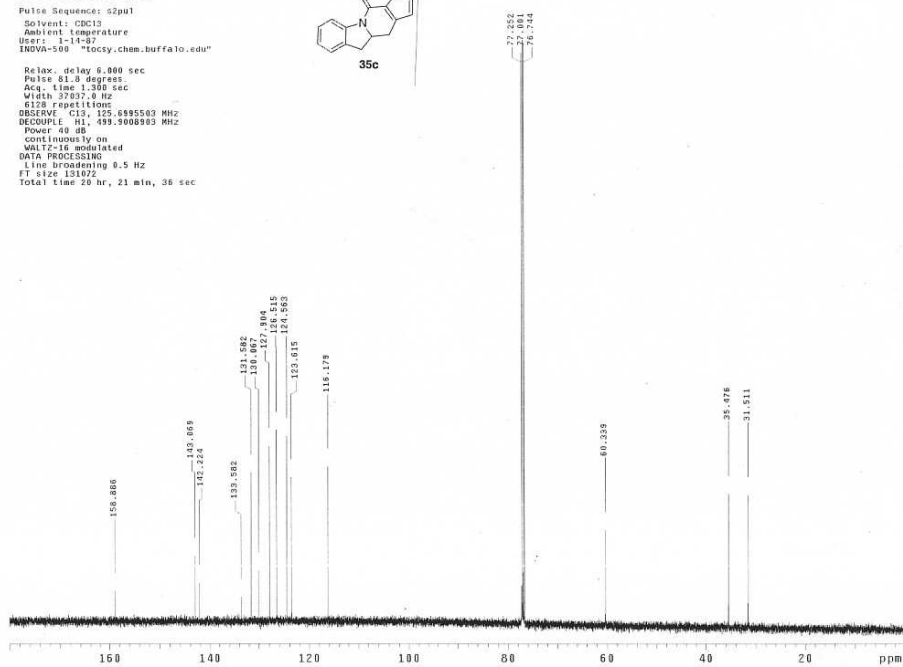

Supplement: NIHMS63568-supplement-3File003.pdf [file NIHMS63568-supplement-3File003.pdf]
